# Supplementary material for: The hydrophobic nature of a novel membrane interface regulates the enzyme activity of a voltage-sensing phosphatase
Source: eLife. 2018 Nov 28;7:e41653. doi: 10.7554/eLife.41653 (PMC6298786; doi:10.7554/eLife.41653)
Supplement: Figure 4—source data 1. [file elife-41653-fig4-data1.xlsx]

## Sheet: FIgure4B
Figure4-source data
Figure4B
WT						Cell
Time(sec)	Average	SD	n		Time(sec)	1	2	3	4	5	6	7	8	9	10	11	12	13	14	15	16	17	18	19	20	21	22	23	24	25	26	27	28	29	30	31	32	33	34	35	36	37	38	39	40	41	42	43	44
0	1	0	56		0	1	1	1	1	1	1	1	1	1	1	1	1	1	1	1	1	1	1	1	1	1	1	1	1	1	1	1	1	1	1	1	1	1	1	1	1	1	1	1	1	1	1	1	1
0.3	0.432475	0.252315	56		0.3	0.196838	0.259953	0.678111	0.489559	0.311815	0.25312	0.259124	0.100473	0.0789732	0.0964187	0.105101	0.0459661	0.116992	0.0854893	0.102932	0.579069	0.618069	0.313812	0.671995	0.746646	0.613945	0.618926	0.66364	0.90369	0.445978	0.377198	0.437334	0.147137	0.678339	0.253823	0.225956	0.297261	0.0918756	0.238305	0.194013	0.157433	0.556769	0.553681	0.447918	0.869136	0.284936	0.247889	0.755548	0.718255
0.6	0.264757	0.20744	56		0.6	0.0750988	0.161593	0.538627	0.301624	0.125769	0.130914	0.114877	0.0638265	0.0430466	0.117424	0.0721196	0.0356015	0.0962992	0.0741282	0.0530428	0.457319	0.334643	0.1502	0.42274	0.536745	0.344649	0.430851	0.436838	0.782584	0.174852	0.136213	0.191797	0.0378017	0.361287	0.0683424	0.0405834	0.170648	0.061409	0.117633	0.0799799	0.0722923	0.403158	0.314136	0.272589	0.654143	0.143902	0.0767916	0.479117	0.357225
0.9	0.194398	0.170629	56		0.9	0.0332016	0.107728	0.448498	0.24594	0.059877	0.0808418	0.0871568	0.0955871	0.0516036	0.144284	0.115655	0.0384226	0.112084	0.100112	0.0444769	0.394053	0.20985	0.106271	0.30231	0.411852	0.216361	0.339607	0.313141	0.660585	0.0821568	0.0820182	0.0904513	0.0304454	0.195354	0.0398399	0.00338195	0.140627	0.0573102	0.0838989	0.0513932	0.0516528	0.324107	0.197793	0.197382	0.452884	0.0964155	0.0497265	0.305924	0.200098
1.2	0.153479	0.144885	56		1.2	0.0245059	0.0573771	0.420601	0.164733	0.0352847	0.0561684	0.076903	0.0882577	0.0495134	0.164256	0.139182	0.0344669	0.117788	0.0976378	0.0550666	0.351051	0.106058	0.0865899	0.230974	0.324044	0.147138	0.282483	0.242011	0.551743	0.0497531	0.0686687	0.0422961	0.0313471	0.123138	0.0355685	-0.0077503	0.116579	0.0550229	0.0708164	0.0289008	0.0463038	0.262023	0.139076	0.157771	0.318472	0.0728561	0.043835	0.220727	0.143981
1.5	0.128948	0.122319	56		1.5	0.0197628	0.0526932	0.375536	0.143852	0.035151	0.0355588	0.0686479	0.108872	0.058397	0.0740358	0.08927	0.0421944	0.100013	0.0848144	0.0464066	0.316679	0.0755401	0.0743791	0.18458	0.274357	0.111909	0.246437	0.195833	0.467305	0.0364978	0.0615954	0.0328664	0.0314895	0.0964118	0.0319958	-0.000140919	0.115544	0.058957	0.0649575	0.032105	0.0442615	0.223697	0.105652	0.130274	0.234593	0.0610304	0.0411807	0.179492	0.120664
1.8	0.11275	0.103379	56		1.8	0.0213439	0.057377	0.317597	0.0951276	0.0295376	0.029463	0.0726451	0.0809284	0.045986	0.089876	0.126429	0.038208	0.0973604	0.0874016	0.0457947	0.292768	0.0584681	0.0676074	0.151593	0.232802	0.0996935	0.222002	0.168091	0.395683	0.0335971	0.0624131	0.0150142	0.0327828	0.0824829	0.0351557	-0.00183189	0.114509	0.0544007	0.0597536	0.0345867	0.0477626	0.178563	0.0863564	0.112746	0.184792	0.053392	0.0417739	0.157855	0.111903
2.1	0.104962	0.0892013	56		2.1	0.0324111	0.0409836	0.302575	0.136891	0.0334135	0.038897	0.0538756	0.106581	0.0510811	0.09573	0.10708	0.037656	0.117257	0.0816648	0.046736	0.271441	0.052727	0.065008	0.131192	0.212566	0.087798	0.199439	0.147191	0.341825	0.0316327	0.0638033	0.0239861	0.0333998	0.0775862	0.0335361	0.00486155	0.109094	0.0538152	0.0582252	0.0338014	0.0468225	0.162429	0.0744598	0.0986616	0.153046	0.0487752	0.0415728	0.146114	0.106557
2.4	0.097094	0.0785239	56		2.4	0.0268775	0.0257611	0.251073	0.109049	0.0132318	0.0246734	0.0654327	0.0914643	0.0553923	0.152548	0.130387	0.0424397	0.135429	0.0833521	0.0543606	0.25508	0.020698	0.0613382	0.114383	0.188852	0.0832685	0.185185	0.132355	0.298499	0.0310085	0.0676261	0.0263664	0.0342541	0.0736153	0.0381091	0.00507292	0.10551	0.0547484	0.0576248	0.0336443	0.0467468	0.14125	0.0702389	0.0904885	0.133142	0.0481004	0.0414622	0.140756	0.103043
2.7	0.0921345	0.0711379	56		2.7	0.0252964	0.0339579	0.236051	0.113689	0.00334135	0.0275762	0.0683003	0.101848	0.0510811	0.165634	0.132806	0.0353255	0.123491	0.102475	0.0519132	0.242547	0.0342952	0.0565106	0.104077	0.180225	0.0781901	0.171867	0.121638	0.264241	0.0306413	0.0672786	0.0160212	0.0341473	0.0719488	0.0365054	0.0114845	0.104794	0.054785	0.0574246	0.0278642	0.0461417	0.123418	0.063818	0.0838916	0.120995	0.0442045	0.0413516	0.137727	0.103043
3	0.0867344	0.0649251	56		3	0.0252964	0.0210773	0.253219	0.0765661	0.0137664	0.016836	0.0606535	0.107192	0.0590502	0.10124	0.139622	0.0424703	0.116461	0.0841395	0.0553961	0.231444	0.011331	0.0540422	0.097399	0.173314	0.0697717	0.157944	0.11199	0.232554	0.0318897	0.0678715	0.0206903	0.0349185	0.0693359	0.0360131	0.0146551	0.10551	0.0599451	0.0574974	0.0358747	0.0447261	0.111955	0.0637202	0.0791482	0.115115	0.0454162	0.0421157	0.134167	0.101851
3.3	0.0843308	0.057403	56		3.3	0.0237154	0.0398127	0.206009	0.102088	0.0049452	0.013643	0.0601321	0.0969614	0.0520609	0.116736	0.103342	0.0389746	0.130256	0.101575	0.0533252	0.220378	0.0342952	0.0531248	0.0919655	0.162609	0.0659285	0.148891	0.106153	0.210615	0.0324955	0.0687096	0.0259086	0.035666	0.0718871	0.0393795	0.0174029	0.110527	0.0598719	0.0565512	0.029749	0.0467901	0.102239	0.0595971	0.0750617	0.108642	0.0443272	0.04104	0.134143	0.101631
3.6	0.0814151	0.0536305	56		3.6	0.0213439	0.0398127	0.214592	0.0788863	0.00294039	0.0323657	0.0801182	0.100931	0.0528447	0.0788567	0.112797	0.0356935	0.138878	0.0886389	0.0569492	0.210026	0.0297628	0.0505253	0.0851474	0.154885	0.0637324	0.141572	0.0991326	0.192745	0.0331565	0.0694047	0.0242607	0.036627	0.0719488	0.0413167	0.0217713	0.103759	0.0640073	0.0557507	0.0335187	0.046682	0.0975522	0.0601675	0.075339	0.10388	0.0465205	0.0418644	0.132357	0.10053
3.9	0.0808098	0.0509565	56		3.9	0.0324111	0.0339578	0.214592	0.0672854	0.0180433	0.0301887	0.0605666	0.113147	0.0574172	0.0991735	0.136544	0.0438196	0.13198	0.107087	0.0482421	0.202532	0.0267412	0.0519234	0.0824833	0.154614	0.0689939	0.134638	0.0939116	0.179695	0.0336522	0.0700998	0.0184015	0.0371135	0.0692536	0.0387761	0.0269851	0.113394	0.0502104	0.0551684	0.0365658	0.0477194	0.0858603	0.0581304	0.0728432	0.104736	0.043867	0.0417136	0.129641	0.10066
4.2	0.0779869	0.0485023	56		4.2	0.0284585	0.0316159	0.197425	0.0835267	0.0126971	0.0214804	0.0649983	0.115437	0.0448102	0.116391	0.113237	0.037472	0.126011	0.087739	0.0513014	0.194892	0.0117843	0.0516831	0.0806254	0.148426	0.0705495	0.13018	0.0907175	0.165253	0.0336705	0.0735751	0.0224297	0.036544	0.0699531	0.0383473	0.0171211	0.111244	0.0471363	0.0552776	0.0365344	0.0473736	0.0861379	0.0605424	0.0719238	0.103093	0.0449561	0.0428497	0.129991	0.0997387
4.5	0.0756544	0.0460592	56		4.5	0.0102767	0.0128806	0.190987	0.0719258	0.021251	0.0175617	0.0731665	0.10597	0.0558495	0.105028	0.100044	0.0432983	0.107972	0.0811024	0.0598673	0.186702	-0.00543888	0.0496516	0.0780138	0.147206	0.0666606	0.123273	0.0878314	0.158434	0.0342029	0.0743928	0.0301199	0.0369711	0.0688626	0.041269	0.0258578	0.108536	0.0445929	0.0549682	0.0408381	0.0464119	0.0860236	0.060249	0.0691945	0.102362	0.0454009	0.0425078	0.129171	0.0997887
4.8	0.0761383	0.0439851	56		4.8	0.0284585	0.0398126	0.180257	0.0649652	0.0168404	0.00711176	0.0649114	0.109177	0.0517996	0.126722	0.0987247	0.0413664	0.119379	0.117773	0.0570433	0.182378	0.0210002	0.0502195	0.0764013	0.142689	0.0670723	0.121127	0.0842805	0.148687	0.0362775	0.0752719	0.0289298	0.0369474	0.0713316	0.0399511	0.0236736	0.105351	0.0485636	0.0564967	0.0362517	0.0468117	0.0840314	0.0585053	0.0704059	0.102224	0.0450327	0.0425279	0.129641	0.100229
5.1	0.0745313	0.0421544	56		5.1	0.0229249	0.0281031	0.160944	0.0812065	0.0110933	0.00217707	0.0683003	0.0971141	0.0579398	0.108815	0.0861917	0.0384839	0.12946	0.110461	0.0565256	0.176735	0.0138994	0.0469429	0.0739124	0.141741	0.0658828	0.116697	0.0809891	0.141618	0.0379665	0.0771527	0.04312	0.0389644	0.0697473	0.0398876	0.0243782	0.110686	0.0545654	0.0563329	0.0406496	0.0465848	0.0794428	0.0609824	0.0687275	0.102141	0.0461678	0.0433926	0.128917	0.10045
5.4	0.0732101	0.04138	56		5.4	0.0245059	0.0269321	0.175966	0.0603248	0.0148356	0.0111756	0.0686479	0.120018	0.0517996	0.035124	0.106201	0.038392	0.113543	0.0928009	0.0569492	0.170725	0.00906482	0.0492366	0.0738073	0.140386	0.0673011	0.114963	0.0781678	0.134406	0.0367549	0.0769687	0.0358876	0.0385848	0.0709407	0.0442384	0.0262101	0.113792	0.0663495	0.055041	0.0400842	0.0469089	0.0794918	0.0595157	0.0679539	0.102541	0.0463211	0.0443175	0.127059	0.101361
5.7	0.0753403	0.0398715	56		5.7	0.0339921	0.030445	0.152361	0.0742459	0.0184443	0.0277213	0.0645638	0.10765	0.0510811	0.11949	0.134345	0.0500751	0.128664	0.109899	0.051772	0.166163	0.0148059	0.047205	0.0735794	0.139347	0.0688109	0.107369	0.0766113	0.132817	0.0378931	0.0760692	0.0382679	0.0377423	0.0714756	0.0406498	0.0193757	0.116101	0.0628728	0.0575338	0.0399899	0.0478383	0.078806	0.0591408	0.0685961	0.0997667	0.0478243	0.0439858	0.128012	0.0992081
L284V						Cell
Time(sec)	Average	SD	n		Time(sec)	1	2	3	4	5
0	1	0	5		0	1	1	1	1	1
0.3	0.504771	0.172907	5		0.3	0.713384	0.303185	0.326129	0.493912	0.687245
0.6	0.253811	0.162666	5		0.6	0.467172	0.0649681	0.0791866	0.260463	0.397266
0.9	0.165576	0.117431	5		0.9	0.344697	0.0318471	0.043573	0.179759	0.228003
1.2	0.125631	0.0880991	5		1.2	0.276515	0.0433121	0.0311402	0.138925	0.138265
1.5	0.0932368	0.0665456	5		1.5	0.205808	0.0203822	0.0324183	0.114742	0.0928335
1.8	0.083376	0.0537972	5		1.8	0.181818	0.0394904	0.0335802	0.0944668	0.0675244
2.1	0.0658092	0.0553914	5		2.1	0.164141	0.00127389	0.0327959	0.079855	0.05098
2.4	0.0603171	0.047946	5		2.4	0.143939	0.00382166	0.0323312	0.0769666	0.0445271
2.7	0.0533762	0.0446693	5		2.7	0.13005	-0.00382165	0.034626	0.0684148	0.0376118
3	0.0480181	0.035541	5		3	0.106061	0.00127389	0.0333769	0.0661494	0.0332295
3.3	0.0455147	0.0413423	5		3.3	0.116162	-0.0089172	0.031024	0.0584471	0.0308574
3.6	0.0424713	0.0385375	5		3.6	0.103535	-0.0140127	0.0323312	0.0591833	0.0313197
3.9	0.0482542	0.0283017	5		3.9	0.0997475	0.0254777	0.028642	0.057994	0.02941
4.2	0.0446564	0.0259532	5		4.2	0.0871212	0.011465	0.0383152	0.0576542	0.0287265
4.5	0.0446703	0.0215594	5		4.5	0.0833333	0.0254777	0.0326797	0.0529535	0.0289074
4.8	0.0407272	0.0292487	5		4.8	0.0871212	-0.00127389	0.0331155	0.0545393	0.0301337
5.1	0.0403611	0.0261409	5		5.1	0.084596	0.00636942	0.0305592	0.0503483	0.0299327
5.4	0.0408813	0.0182642	5		5.4	0.0707071	0.0203822	0.0311692	0.0525571	0.0295909
5.7	0.0410546	0.021598	5		5.7	0.0770202	0.0140127	0.0315178	0.0517642	0.0309579
L284F						Cell
Time(sec)	Average	SD	n		Time(sec)	1	2	3	4	5	6	7	8	9	10	11	12	13	14	15	16	17	18	19	20	21	22	23	24	25	26	27	28	29	30	31	32	33	34	35
0	1	0	35		0	1	1	1	1	1	1	1	1	1	1	1	1	1	1	1	1	1	1	1	1	1	1	1	1	1	1	1	1	1	1	1	1	1	1	1
0.3	0.234262	0.15311	35		0.3	0.0180103	0.012037	0.0922659	0.128578	0.0758297	0.0953215	0.0330703	0.134504	0.195115	0.113165	0.251073	0.34661	0.24826	0.2901	0.567467	0.142553	0.307467	0.478204	0.186319	0.107131	0.239775	0.510947	0.603221	0.140243	0.040126	0.260125	0.251697	0.134089	0.200595	0.451482	0.287872	0.344234	0.352474	0.35503	0.204176
0.6	0.118592	0.08285	35		0.6	0.0317324	0.00925926	0.0434193	0.0868588	0.0504329	0.0743967	0.0306782	0.105283	0.172094	0.0921649	0.208751	0.251916	0.171224	0.185006	0.244878	0.0617525	0.0901365	0.190819	0.0473562	0.0366858	0.086899	0.254518	0.364298	0.0332695	0.0142712	0.0780439	0.0991811	0.0431127	0.0718433	0.222895	0.148251	0.174405	0.161225	0.129875	0.083777
0.9	0.0848375	0.0597921	35		0.9	0.0248714	0.0185185	0.0332429	0.0814972	0.0591631	0.072145	0.0280342	0.0950692	0.169568	0.0765367	0.219996	0.213358	0.135352	0.156606	0.123389	0.0414636	0.0363611	0.0865326	0.0425257	0.0214588	0.039199	0.143918	0.240742	0.0273817	0.02048	0.0507698	0.0786729	0.0322335	0.0453655	0.137183	0.100054	0.115299	0.0938783	0.0673348	0.0411117
1.2	0.0722486	0.0550358	35		1.2	0.0128645	0.0240741	0.0325644	0.0763908	0.0642136	0.0722132	0.0312657	0.0975375	0.164234	0.083374	0.232877	0.191815	0.143095	0.160285	0.0739896	0.0475769	0.0277236	0.0489539	0.0341585	0.021242	0.0203079	0.0846221	0.170562	0.0197914	0.0049115	0.0475994	0.0744033	0.0305946	0.0439664	0.102147	0.0720065	0.087103	0.0640227	0.0463773	0.0198359
1.5	0.0661991	0.0512924	35		1.5	0.0205832	0.0222222	0.0298508	0.0730973	0.0664502	0.070189	0.0280762	0.0943032	0.174481	0.0883974	0.215293	0.173202	0.141233	0.156376	0.0587435	0.0379197	0.0314154	0.039285	0.0265678	0.0194538	0.0146406	0.0518679	0.131926	0.0224161	0.0156612	0.0470131	0.0699237	0.0271978	0.0411333	0.0844351	0.0690014	0.0706743	0.0492214	0.0412086	0.0135081
1.8	0.0628091	0.0494092	35		1.8	0.0248714	0.012037	0.031886	0.0750121	0.0544733	0.0684604	0.0289575	0.0938777	0.175182	0.0875602	0.198732	0.16391	0.139371	0.15948	0.0464586	0.0325153	0.0207579	0.0325411	0.0310532	0.0256313	0.0118069	0.0423979	0.114483	0.0224871	0.0250209	0.0480988	0.0694337	0.0285755	0.0472543	0.0734016	0.064879	0.0594614	0.0437898	0.0381506	0.00630884
2.1	0.0643792	0.0507389	35		2.1	0.0128645	0.00740741	0.031886	0.0753951	0.0575758	0.0696659	0.0360081	0.0947571	0.190623	0.081281	0.214476	0.160477	0.144467	0.159825	0.0456583	0.0378311	0.0332265	0.0301442	0.0379539	0.0310502	0.0175215	0.0332754	0.0982687	0.0441229	0.0298397	0.0502921	0.0761531	0.0294544	0.0440364	0.0690076	0.0695408	0.0555816	0.0385148	0.0387987	0.0062899
2.4	0.0639614	0.0502029	35		2.4	0.0231561	0.0277778	0.0251018	0.07611	0.0560606	0.0718493	0.0351687	0.0964026	0.202134	0.0872113	0.210591	0.153375	0.135646	0.160515	0.0421168	0.0405777	0.0390777	0.0331911	0.0365738	0.0277989	0.0197412	0.0317116	0.0858625	0.0328439	0.0274303	0.0491412	0.077693	0.0289793	0.044596	0.0663169	0.065611	0.0517161	0.0377802	0.0385827	0.000208401
2.7	0.0632002	0.0475208	35		2.7	0.016295	0.0240741	0.027137	0.0741951	0.058153	0.0707121	0.0277824	0.0969984	0.182341	0.0825368	0.195052	0.152842	0.142017	0.165459	0.0417567	0.0395145	0.0369184	0.0343287	0.0326059	0.0296413	0.0219137	0.0292354	0.077154	0.0295098	0.0347512	0.0507915	0.0810527	0.0294544	0.0486884	0.0664525	0.066343	0.050167	0.0386232	0.0375606	0.0199496
3	0.0637217	0.048344	35		3	0.0120069	0.0287037	0.0237449	0.0750887	0.0535354	0.0710533	0.0372251	0.0929982	0.20087	0.0875602	0.199346	0.149025	0.139469	0.159365	0.0401361	0.0450961	0.0337141	0.0382693	0.0375226	0.0303457	0.0216067	0.0362728	0.0699533	0.0347592	0.039848	0.0509869	0.0753832	0.0297632	0.0496677	0.0645361	0.0685776	0.0498259	0.0371178	0.0388735	0.00801394
3.3	0.0644146	0.0518578	35		3.3	0.0137221	0.00740741	0.0373134	0.077693	0.0523088	0.0693247	0.0396173	0.0975942	0.165637	0.0796763	0.24678	0.150564	0.150642	0.169139	0.0412965	0.0404005	0.034341	0.0348568	0.041318	0.0331094	0.0218901	0.030278	0.063461	0.0303611	0.0315077	0.0526807	0.0822426	0.0332787	0.0503323	0.0658717	0.0746648	0.0493427	0.0370214	0.0388901	0.00994637
3.6	0.0634757	0.0509019	35		3.6	0.0222985	-0.00648149	0.0325644	0.0790206	0.055772	0.0712352	0.0360081	0.0993248	0.191887	0.075839	0.219587	0.144468	0.147114	0.168794	0.0409564	0.0415522	0.03455	0.0381881	0.0379539	0.0329468	0.0234013	0.0271069	0.0595942	0.0336951	0.0322491	0.0532019	0.0816827	0.0300957	0.0501574	0.0642264	0.0674603	0.0497406	0.0378042	0.0394718	0.00818444
3.9	0.0653808	0.0473625	35		3.9	0.0317324	0.00925925	0.0278155	0.0803993	0.0573593	0.0704847	0.0376028	0.0975375	0.184728	0.0880486	0.193416	0.145089	0.154954	0.172818	0.0394358	0.0399575	0.032321	0.0363599	0.038299	0.033597	0.0252668	0.0361859	0.0566892	0.0412854	0.0416088	0.0530064	0.0856723	0.0323048	0.0531654	0.0651749	0.0715056	0.0502238	0.0391652	0.0391644	0.0266942
4.2	0.0650078	0.0475561	35		4.2	0.0300172	0.012037	0.0162822	0.0753951	0.0539683	0.0726681	0.0410022	0.0978495	0.194133	0.0826066	0.185647	0.145533	0.16603	0.162125	0.0404162	0.0436786	0.0408192	0.0406256	0.0426982	0.0333803	0.025196	0.0307124	0.0538168	0.0355395	0.0382726	0.052203	0.0813327	0.0325186	0.0526408	0.0650975	0.0767067	0.0502807	0.0388159	0.0416989	0.0235303
4.5	0.0662456	0.0476794	35		4.5	0.0325901	0.00185185	0.0305292	0.0787653	0.0580087	0.0741238	0.0362599	0.098729	0.191185	0.0787693	0.187692	0.139733	0.152602	0.186156	0.040056	0.0436786	0.0426303	0.0400975	0.0464936	0.0346266	0.0257863	0.0366203	0.0517111	0.0398666	0.0391067	0.0540922	0.0872821	0.0323286	0.0521161	0.0687172	0.0763215	0.0508491	0.0385871	0.0412501	0.0293845
4.8	0.0681839	0.0488251	35		4.8	0.0154374	0.0175926	0.0373134	0.0772589	0.0554834	0.0709623	0.052795	0.0992113	0.199045	0.0823973	0.212431	0.139644	0.155935	0.175808	0.0418968	0.042704	0.0463221	0.0388381	0.0494264	0.0417796	0.027274	0.039444	0.0484942	0.0456835	0.0382726	0.0534625	0.0810527	0.0322335	0.0524309	0.0661234	0.0829095	0.0525545	0.040225	0.0412003	0.0327947
5.1	0.0680988	0.0470841	35		5.1	0.0283019	0.0314815	0.0230665	0.0826206	0.0529582	0.0713035	0.0413379	0.0945302	0.177288	0.082467	0.213044	0.140029	0.152994	0.180292	0.0410764	0.049969	0.0406799	0.0424944	0.0536531	0.0373361	0.0251252	0.0389227	0.0427168	0.0412854	0.0342878	0.0551128	0.0819626	0.0330174	0.0534453	0.0665492	0.0810988	0.0519008	0.0386955	0.0420728	0.0603414
5.4	0.0672323	0.049471	35		5.4	0.0111492	0.012963	0.0352781	0.0825184	0.0591631	0.0688926	0.0367635	0.0966296	0.187535	0.0834438	0.219791	0.138934	0.153092	0.181097	0.0420968	0.0462479	0.0455559	0.0416819	0.0505477	0.0360355	0.0253613	0.0423545	0.0231098	0.0401504	0.0369753	0.0553517	0.0797228	0.0332312	0.052256	0.0688721	0.0777084	0.0541036	0.0395746	0.0428789	0.0520622
5.7	0.0670684	0.04839	35		5.7	0.0171527	0.0268518	0.0149254	0.0800674	0.0620491	0.0726909	0.0376028	0.0972537	0.17799	0.0783507	0.22204	0.137632	0.149368	0.177303	0.0427371	0.049526	0.04472	0.0398944	0.0462348	0.0392869	0.0285964	0.039053	0.0191585	0.0388735	0.0428135	0.0532887	0.0815427	0.0327086	0.0532354	0.070769	0.0799045	0.053393	0.0413209	0.0436268	0.0554345
L284Q						Cell
Time(sec)	Average	SD	n		Time(sec)	1	2	3	4
0	1	0	4		0	1	1	1	1
0.3	0.912177	0.0406029	4		0.3	0.938547	0.841924	0.933586	0.934653
0.6	0.817715	0.0809986	4		0.6	0.914804	0.694158	0.806452	0.855446
0.9	0.722589	0.10738	4		0.9	0.871508	0.57732	0.683112	0.758416
1.2	0.63032	0.133409	4		1.2	0.831006	0.463918	0.57685	0.649505
1.5	0.55807	0.118498	4		1.5	0.715084	0.42268	0.466793	0.627723
1.8	0.521748	0.148595	4		1.8	0.756983	0.381443	0.40797	0.540594
2.1	0.429339	0.125947	4		2.1	0.618715	0.295533	0.337761	0.465346
2.4	0.367645	0.115499	4		2.4	0.536313	0.249141	0.273245	0.411881
2.7	0.312902	0.10394	4		2.7	0.459497	0.209622	0.220114	0.362376
3	0.299822	0.117665	4		3	0.467877	0.187285	0.191651	0.352475
3.3	0.258176	0.0986768	4		3.3	0.393855	0.166667	0.16129	0.310891
3.6	0.235546	0.076946	4		3.6	0.329609	0.190722	0.134725	0.287129
3.9	0.205698	0.0802171	4		3.9	0.300279	0.137457	0.11575	0.269307
4.2	0.183617	0.0582622	4		4.2	0.25838	0.14433	0.111954	0.219802
4.5	0.158187	0.0655361	4		4.5	0.238827	0.123711	0.0702087	0.2
4.8	0.15736	0.0752481	4		4.8	0.24581	0.101375	0.0664137	0.215842
5.1	0.148498	0.061374	4		5.1	0.226257	0.0979382	0.0796964	0.190099
5.4	0.125642	0.0630594	4		5.4	0.201117	0.072165	0.0550285	0.174257
5.7	0.122155	0.0641498	4		5.7	0.215084	0.104811	0.0360531	0.132673
F285Q						Cell
Time(sec)	Average	SD	n		Time(sec)	1	2	3	4
0	1	0	4		0	1	1	1	1
0.3	0.998867	0.0630263	4		0.3	1.10101	0.966547	0.99537	0.93254
0.6	0.985536	0.0644106	4		0.6	1.08754	0.955795	0.986111	0.912699
0.9	0.956768	0.0695644	4		0.9	1.04714	0.936679	0.986111	0.857143
1.2	0.922948	0.0357665	4		1.2	0.969697	0.927121	0.925926	0.869048
1.5	0.912663	0.0747361	4		1.5	1.01684	0.911589	0.916667	0.805556
1.8	0.928146	0.0674107	4		1.8	1.03704	0.892473	0.925926	0.857143
2.1	0.910682	0.0463151	4		2.1	0.962963	0.890084	0.944444	0.845238
2.4	0.892578	0.0350962	4		2.4	0.949495	0.866189	0.893519	0.861111
2.7	0.889021	0.0491952	4		2.7	0.96633	0.835125	0.893519	0.861111
3	0.888249	0.0483851	4		3	0.962963	0.83871	0.898148	0.853175
3.3	0.862467	0.0727588	4		3.3	0.956229	0.812425	0.907407	0.773809
3.6	0.871461	0.0617727	4		3.6	0.952862	0.827957	0.907407	0.797619
3.9	0.868511	0.0483632	4		3.9	0.89899	0.793309	0.861111	0.920635
4.2	0.840238	0.0690332	4		4.2	0.93266	0.774194	0.773148	0.880952
4.5	0.817827	0.0440055	4		4.5	0.821549	0.746714	0.865741	0.837302
4.8	0.813551	0.0554518	4		4.8	0.888889	0.732378	0.819444	0.813492
5.1	0.793392	0.0622556	4		5.1	0.882155	0.706093	0.791667	0.793651
5.4	0.793466	0.0561034	4		5.4	0.861953	0.706093	0.796296	0.809524
5.7	0.80526	0.0842609	4		5.7	0.915825	0.682198	0.833333	0.789683
[truncated: 12 more columns]
