# Supplementary material for: The hydrophobic nature of a novel membrane interface regulates the enzyme activity of a voltage-sensing phosphatase
Source: eLife. 2018 Nov 28;7:e41653. doi: 10.7554/eLife.41653 (PMC6298786; doi:10.7554/eLife.41653)
Supplement: Figure 6—source data 1. [file elife-41653-fig6-data1.xlsx]

## Sheet: Figure6
Figure6-souce data
Figure6B,C,D
WT						Cell
Time(sec)	Average	SD	n		Time(sec)	1	2	3	4	5	6	7	8	9	10	11	12	13	14	15	16	17	18	19	20	21	22	23	24	25	26	27	28	29	30	31	32	33	34	35	36	37	38	39	40	41	42	43	44
0	1	0	45		0	1	1	1	1	1	1	1	1	1	1	1	1	1	1	1	1	1	1	1	1	1	1	1	1	1	1	1	1	1	1	1	1	1	1	1	1	1	1	1	1	1	1	1	1
0.3	0.910806	0.10048	45		0.3	0.803044	0.581851	0.544822	0.722775	0.730584	0.770924	0.927434	0.970985	0.916399	0.966352	0.979767	0.976689	0.959916	0.986549	0.99125	0.957071	0.951876	0.953314	0.944655	0.964321	0.947856	0.92304	0.872077	0.849533	0.899814	0.85761	0.821996	0.964727	0.925337	0.936404	0.979419	0.895479	0.928775	0.989225	0.985778	0.995335	0.979613	0.985799	0.983245	0.911516	0.920054	0.98165	0.958903	0.917296
0.6	0.829559	0.15747	45		0.6	0.637536	0.340368	0.424273	0.475675	0.526986	0.569531	0.842428	0.942556	0.822403	0.917237	0.953168	0.939581	0.910657	0.971468	0.982778	0.905397	0.889715	0.895387	0.870592	0.924722	0.874042	0.840005	0.747043	0.692594	0.787784	0.698268	0.640363	0.906384	0.835068	0.85265	0.95643	0.784869	0.845361	0.978231	0.969416	0.992987	0.95642	0.968584	0.963743	0.804239	0.829106	0.963126	0.917544	0.840024
0.9	0.755995	0.198885	45		0.9	0.50994	0.251131	0.287761	0.308052	0.36478	0.391454	0.747802	0.906311	0.722708	0.870141	0.921141	0.899608	0.862018	0.952546	0.977007	0.850799	0.822171	0.854406	0.786729	0.890637	0.799034	0.754905	0.634739	0.550866	0.679249	0.553902	0.494372	0.856473	0.742721	0.76913	0.929452	0.69335	0.758175	0.966777	0.95174	0.986994	0.93005	0.94974	0.941879	0.69693	0.738317	0.942396	0.874282	0.7377
1.2	0.697147	0.219928	45		1.2	0.414314	0.204703	0.205894	0.213069	0.316074	0.321598	0.655913	0.874951	0.637208	0.812426	0.886548	0.86542	0.815081	0.934704	0.969219	0.795007	0.76079	0.799358	0.703939	0.858705	0.72621	0.678309	0.541663	0.437487	0.593213	0.447073	0.387256	0.805352	0.661113	0.695137	0.902242	0.619135	0.672012	0.954896	0.930619	0.982839	0.901838	0.928712	0.918529	0.597414	0.66448	0.919679	0.83286	0.654392
1.5	0.647483	0.232403	45		1.5	0.347845	0.162496	0.232706	0.15514	0.26576	0.238272	0.579242	0.847108	0.562643	0.762161	0.857876	0.824418	0.770214	0.915999	0.961257	0.738705	0.701862	0.751121	0.623778	0.828962	0.657857	0.610763	0.471698	0.347371	0.51759	0.366171	0.310428	0.762163	0.593048	0.629415	0.871566	0.556557	0.591219	0.94221	0.90916	0.977618	0.872228	0.906421	0.893919	0.517956	0.598233	0.895354	0.792614	0.577724
1.8	0.60364	0.241553	45		1.8	0.291658	0.159934	0.192386	0.113875	0.199649	0.201672	0.50651	0.817995	0.499422	0.714914	0.820963	0.780634	0.724841	0.898201	0.954651	0.683604	0.645579	0.710195	0.550362	0.79776	0.591909	0.544858	0.411212	0.280131	0.456322	0.310366	0.254386	0.726568	0.534041	0.574462	0.838975	0.506441	0.519226	0.929305	0.886612	0.972566	0.839794	0.882276	0.866954	0.455569	0.544813	0.866536	0.756099	0.542107
2.1	0.566525	0.244794	45		2.1	0.256918	0.124661	0.178264	0.0942498	0.216908	0.199536	0.443357	0.784584	0.442183	0.670496	0.792687	0.748533	0.68347	0.879845	0.947918	0.633814	0.595134	0.670654	0.483635	0.770208	0.533162	0.491101	0.368421	0.226774	0.402882	0.263878	0.213844	0.691456	0.48432	0.526372	0.808241	0.466679	0.455778	0.916557	0.861895	0.967021	0.804074	0.858702	0.839536	0.407944	0.500172	0.839673	0.723265	0.452158
2.4	0.534842	0.244405	45		2.4	0.206514	0.142749	0.2149	0.0781345	0.206231	0.181235	0.393141	0.749902	0.399112	0.626983	0.768654	0.706668	0.64472	0.85979	0.941069	0.589217	0.546687	0.633605	0.423198	0.742406	0.479397	0.439592	0.335921	0.185973	0.361268	0.227878	0.184509	0.662309	0.440835	0.489286	0.775114	0.431639	0.401046	0.90148	0.836419	0.963036	0.768823	0.833345	0.810644	0.367654	0.465528	0.810398	0.690743	0.408995
2.7	0.504413	0.247042	45		2.7	0.197679	0.1224	0.170282	0.0708705	0.167032	0.176684	0.350887	0.733783	0.36043	0.59043	0.747434	0.681605	0.616089	0.83977	0.933153	0.546503	0.504023	0.598881	0.36828	0.717505	0.429897	0.392517	0.299269	0.157505	0.32592	0.201341	0.161402	0.640416	0.403487	0.456411	0.740841	0.402363	0.352931	0.888022	0.807881	0.95593	0.732715	0.807695	0.781208	0.333939	0.437098	0.780461	0.663491	0.345306
3	0.479594	0.244639	45		3	0.174706	0.127223	0.18379	0.0645526	0.170104	0.172039	0.311743	0.704181	0.327832	0.557366	0.723796	0.65554	0.593414	0.818905	0.926907	0.505763	0.464174	0.570139	0.322556	0.69149	0.388776	0.358379	0.288074	0.133183	0.296802	0.175878	0.142589	0.622489	0.37127	0.426587	0.707336	0.376467	0.312284	0.872465	0.780077	0.949844	0.695561	0.780726	0.750621	0.308475	0.412054	0.750114	0.632296	0.305463
3.3	0.456594	0.240932	45		3.3	0.167878	0.125415	0.22063	0.063759	0.163522	0.166558	0.278446	0.681516	0.30047	0.527	0.698727	0.624663	0.569934	0.798205	0.918365	0.468279	0.426264	0.532979	0.280907	0.666916	0.35076	0.318168	0.266679	0.116064	0.273763	0.16	0.128953	0.602047	0.340306	0.402756	0.674093	0.352475	0.277443	0.856992	0.749775	0.941842	0.659769	0.754395	0.72023	0.282348	0.391638	0.718695	0.605783	0.273468
3.6	0.434363	0.239365	45		3.6	0.15583	0.109135	0.205485	0.0584178	0.15811	0.139062	0.260118	0.6568	0.279602	0.499821	0.67731	0.597652	0.549214	0.777323	0.912351	0.434678	0.394499	0.505898	0.245905	0.642035	0.319842	0.289255	0.249165	0.10306	0.251413	0.145585	0.117112	0.585056	0.315594	0.380126	0.643504	0.331767	0.247248	0.840611	0.719097	0.937085	0.626143	0.7264	0.689478	0.264834	0.368974	0.69054	0.577893	0.24751
3.9	0.417849	0.233014	45		3.9	0.140648	0.139584	0.225952	0.0597302	0.194969	0.162935	0.243656	0.639508	0.260222	0.475358	0.660975	0.56722	0.527159	0.757738	0.905675	0.403751	0.364484	0.482085	0.216492	0.618633	0.288771	0.259005	0.234721	0.0922187	0.234846	0.133634	0.107691	0.575996	0.291823	0.360658	0.61274	0.313948	0.221241	0.823728	0.688655	0.928095	0.593176	0.701049	0.659803	0.246199	0.354693	0.660256	0.553183	0.230305
4.2	0.398016	0.231012	45		4.2	0.134544	0.126771	0.188907	0.0631486	0.158403	0.152903	0.225659	0.619773	0.24264	0.4528	0.641927	0.539737	0.508095	0.737466	0.898525	0.375389	0.336941	0.461095	0.189281	0.597018	0.26548	0.242362	0.232644	0.0845537	0.217479	0.124122	0.101631	0.560809	0.27371	0.342708	0.582108	0.296679	0.200656	0.805289	0.656954	0.920526	0.561237	0.674492	0.631584	0.230566	0.338111	0.633345	0.527809	0.188953
4.5	0.381181	0.225928	45		4.5	0.121651	0.105517	0.169464	0.0652545	0.176686	0.169624	0.205714	0.578839	0.227598	0.432732	0.621595	0.505633	0.4888	0.717707	0.892035	0.348893	0.312993	0.433018	0.167272	0.575518	0.241115	0.217579	0.221089	0.0752036	0.205281	0.116244	0.0955422	0.545962	0.255118	0.327838	0.554376	0.281424	0.180658	0.789169	0.625207	0.913096	0.532511	0.648512	0.602918	0.220166	0.325787	0.607476	0.501997	0.212496
4.8	0.366407	0.222319	45		4.8	0.123097	0.105819	0.207122	0.0592113	0.173614	0.141663	0.197835	0.582845	0.212967	0.415134	0.60684	0.472197	0.471691	0.697548	0.884502	0.324845	0.289673	0.422883	0.148443	0.554287	0.221561	0.201725	0.202492	0.0704614	0.193994	0.111195	0.0904646	0.537949	0.238539	0.314114	0.52911	0.267751	0.164548	0.771336	0.595355	0.903936	0.506259	0.623006	0.574423	0.206683	0.311374	0.581117	0.478263	0.182916
5.1	0.351996	0.217341	45		5.1	0.113338	0.117275	0.188498	0.0617751	0.158403	0.161449	0.187801	0.556956	0.203907	0.398121	0.584929	0.457704	0.453247	0.679784	0.877108	0.302394	0.268522	0.393587	0.132367	0.53346	0.203525	0.187208	0.211339	0.0706254	0.183172	0.10522	0.0864085	0.521087	0.225259	0.301742	0.503452	0.255875	0.150133	0.752365	0.564668	0.896367	0.481558	0.598793	0.548156	0.197199	0.299976	0.558195	0.45563	0.156656
5.4	0.338766	0.212945	45		5.4	0.106149	0.12255	0.201392	0.0576242	0.154307	0.166465	0.178844	0.539664	0.195462	0.381599	0.567756	0.438121	0.437839	0.661602	0.869065	0.282831	0.252639	0.375588	0.117929	0.514055	0.189926	0.174573	0.192651	0.0635718	0.176608	0.100049	0.0828383	0.507255	0.211848	0.289288	0.479593	0.243328	0.138402	0.733363	0.536375	0.888165	0.458771	0.574627	0.522463	0.188111	0.290509	0.535226	0.433298	0.140658
5.7	0.327218	0.209146	45		5.7	0.098277	0.118933	0.197912	0.0582957	0.153137	0.172596	0.173122	0.533314	0.188326	0.368472	0.557343	0.417981	0.424823	0.643342	0.866585	0.263726	0.23474	0.362685	0.105927	0.492805	0.1766	0.158902	0.188228	0.062692	0.16826	0.0940244	0.0799524	0.495115	0.200399	0.280093	0.459519	0.233669	0.127407	0.715185	0.507557	0.877568	0.436985	0.551739	0.498532	0.179385	0.284876	0.512793	0.412393	0.134923
WT	Average	SD	n
Time constant	1.03971	1.42079	45		Time constant	0.191629	0.0768872	0.0680793	0.116123	0.115043	0.122789	0.368104	1.43148	0.346014	0.686989	1.13504	1.04026	1.05479	2.10049	6.58059	0.83139	0.670739	0.747836	0.523435	1.35064	0.550265	0.462327	0.242916	0.217463	0.304799	0.21507	0.18496	1.34554	0.393506	0.380015	1.15953	0.315791	0.436959	2.8595	1.39784	7.38651	1.07899	1.55312	1.32594	0.299548	0.327288	1.35992	1.11726	0.420941
Rate constant	2.86537	3.18831	45		Rate constant	5.21842	13.0061	14.6888	8.61156	8.6924	8.14405	2.71662	0.698578	2.89006	1.45563	0.881026	0.961298	0.948056	0.476079	0.151962	1.2028	1.49089	1.33719	1.91046	0.74039	1.81731	2.16297	4.11665	4.59848	3.28085	4.64965	5.40657	0.743196	2.54126	2.63148	0.862418	3.16665	2.28854	0.349711	0.715389	0.135382	0.926793	0.643865	0.754182	3.33836	3.05541	0.735337	0.895047	2.37563
Qoff charge	38.3993	23.8877	45		Qoff charge	32.4106	52.2999	75.4778	84.4194	64.5732	95.583	74.3939	13.1959	10.1157	15.8024	12.9624	6.22639	6.99307	11.2614	9.14095	29.8981	23.5475	23.1375	53.6547	40.8185	36.1829	33.673	38.5243	73.0393	36.6253	56.6338	116.685	36.672	39.4723	49.4256	34.6426	48.9991	33.5139	26.3194	38.6047	24.3701	45.8183	39.4129	33.5769	32.6491	27.0901	28.0165	29.338	19.9069
L284F						Cell
Time(sec)	Average	SD	n		Time(sec)	1	2	3	4	5	6	7	8	9	10	11	12	13	14	15	16	17	18	19	20	21	22	23	24	25	26	27	28	29	30	31	32	33	34	35
0	1	0	35		0	1	1	1	1	1	1	1	1	1	1	1	1	1	1	1	1	1	1	1	1	1	1	1	1	1	1	1	1	1	1	1	1	1	1	1
0.3	0.810488	0.173908	35		0.3	0.641875	0.54276	0.365681	0.312764	0.48232	0.843036	0.682559	0.789767	0.826513	0.761196	0.796864	0.668934	0.626485	0.643102	0.832131	0.879313	0.960204	0.913809	0.958603	0.973296	0.897966	0.839807	0.881703	0.961815	0.975989	0.932975	0.903519	0.948489	0.946158	0.901716	0.935671	0.957909	0.95704	0.949633	0.875472
0.6	0.67127	0.247733	35		0.6	0.416414	0.0897545	0.184447	0.10535	0.205006	0.686973	0.432386	0.59744	0.606705	0.549676	0.602998	0.388007	0.461358	0.495969	0.685526	0.765927	0.908518	0.815637	0.914415	0.94022	0.806949	0.689804	0.777031	0.921151	0.944284	0.855817	0.788459	0.882238	0.868036	0.800023	0.859805	0.898467	0.901914	0.89328	0.754464
0.9	0.572777	0.273513	35		0.9	0.296339	0.0406435	-0.111183	0.0830596	0.116011	0.562074	0.284925	0.433087	0.400013	0.41116	0.457313	0.245142	0.368236	0.409481	0.564785	0.646385	0.856786	0.719549	0.867673	0.910063	0.72342	0.555407	0.687576	0.872422	0.909824	0.780165	0.681281	0.815734	0.789434	0.703617	0.780863	0.84405	0.846824	0.836815	0.658238
1.2	0.505647	0.266482	35		1.2	0.162276	0.0795936	-0.00192798	0.0680432	0.0282082	0.467399	0.2053	0.309829	0.250005	0.3212	0.353056	0.178487	0.291538	0.357347	0.4714	0.558339	0.802621	0.62204	0.825093	0.876246	0.648821	0.451581	0.616999	0.828774	0.875154	0.704839	0.589726	0.751606	0.725347	0.610897	0.708223	0.789433	0.797763	0.78831	0.584089
1.5	0.452047	0.262803	35		1.5	0.158545	0.0381033	-0.125964	0.0924448	0.0544299	0.396993	0.156282	0.227799	0.155829	0.262248	0.292859	0.146967	0.274527	0.321149	0.397538	0.489621	0.745822	0.550767	0.787742	0.848679	0.586427	0.36569	0.554042	0.788674	0.843047	0.634273	0.51323	0.686867	0.661953	0.527985	0.637562	0.741935	0.742419	0.742666	0.522505
1.8	0.412108	0.245591	35		1.8	0.18699	0.0660457	-0.0501286	0.0621773	0.071911	0.340295	0.117994	0.174942	0.106033	0.217279	0.239757	0.127968	0.262355	0.297506	0.331883	0.40544	0.690419	0.483993	0.748001	0.817145	0.52162	0.292086	0.499937	0.74815	0.811852	0.569609	0.440394	0.63271	0.60096	0.45757	0.575882	0.695838	0.700004	0.701772	0.477378
2.1	0.37056	0.243559	35		2.1	0.144323	-0.100762	-0.0212082	0.0741436	0.0162893	0.293878	0.0952729	0.142112	0.0755156	0.191116	0.209773	0.111615	0.233319	0.27469	0.292092	0.355333	0.638417	0.43029	0.710153	0.788344	0.474167	0.239504	0.45117	0.712969	0.783582	0.511659	0.395355	0.580299	0.548613	0.393995	0.516729	0.651416	0.655809	0.662893	0.436744
2.4	0.342984	0.229467	35		2.4	0.173001	-0.0906012	0.0218509	0.0605349	0.0174811	0.257251	0.0773889	0.118043	0.061419	0.163285	0.178874	0.097636	0.245491	0.265516	0.264984	0.317681	0.589253	0.381796	0.675687	0.759318	0.419226	0.18928	0.412596	0.682648	0.755236	0.461767	0.343842	0.534278	0.497652	0.341989	0.47021	0.613257	0.613683	0.627473	0.405408
2.7	0.316011	0.218813	35		2.7	0.118443	0.0567316	-0.117609	0.0706241	0.0472785	0.225785	0.0695037	0.10235	0.0501802	0.14649	0.165484	0.0888385	0.223053	0.248989	0.222457	0.285898	0.543962	0.340074	0.643989	0.733498	0.380738	0.15239	0.374252	0.651842	0.728472	0.41863	0.303659	0.491892	0.452295	0.295711	0.426888	0.576118	0.568399	0.595983	0.377086
3	0.292959	0.210115	35		3	0.118209	-0.0575783	-0.0199229	0.0340216	0.0230433	0.201495	0.054343	0.0934995	0.0443795	0.131272	0.146715	0.0897021	0.234052	0.240147	0.221835	0.264424	0.501554	0.30735	0.612551	0.708521	0.339406	0.126623	0.336975	0.62277	0.704331	0.379034	0.280014	0.450802	0.416115	0.258498	0.390995	0.542255	0.535534	0.566021	0.354581
3.3	0.272328	0.202422	35		3.3	0.148286	-0.00338696	-0.113753	0.0640545	-0.0154946	0.181875	0.0549933	0.0867484	0.0412446	0.121173	0.140764	0.0790695	0.219387	0.229412	0.201815	0.233357	0.464213	0.276047	0.580759	0.684079	0.301782	0.106592	0.314078	0.594363	0.679843	0.341513	0.24912	0.41171	0.382177	0.228773	0.352879	0.51187	0.504122	0.544616	0.333398
3.6	0.264961	0.180594	35		3.6	0.15155	0.11685	-0.00192803	0.069451	0.0818435	0.163154	0.0500752	0.0824358	0.0402849	0.110593	0.146944	0.0709737	0.224373	0.224542	0.190251	0.204295	0.42926	0.255067	0.551592	0.659081	0.272835	0.0853957	0.28555	0.569142	0.657216	0.307207	0.223505	0.38275	0.347172	0.200788	0.325296	0.483142	0.47467	0.520933	0.317331
3.9	0.24929	0.172219	35		3.9	0.155281	0.0567316	0.0398458	0.100892	0.0933651	0.151202	0.0512539	0.0785974	0.0361477	0.10399	0.131724	0.0697863	0.208095	0.21629	0.165009	0.190551	0.394712	0.23101	0.525429	0.636715	0.24252	0.0560473	0.262317	0.544243	0.635127	0.283197	0.202322	0.355447	0.32444	0.177765	0.299601	0.45769	0.451683	0.498625	0.29751
4.2	0.230111	0.173788	35		4.2	0.144789	0.0745131	-0.0623394	0.0354294	0.0270163	0.137065	0.0439784	0.0751202	0.0369367	0.096769	0.117647	0.0668718	0.206189	0.208322	0.164884	0.175089	0.368249	0.218886	0.497398	0.614308	0.220054	0.0495836	0.245008	0.522792	0.637267	0.256705	0.19437	0.326668	0.295784	0.159402	0.274698	0.435534	0.425718	0.479831	0.28335
4.5	0.223096	0.160199	35		4.5	0.134763	0.0855207	0.0321337	0.0879869	0.0707191	0.128582	0.0443848	0.0726591	0.0381097	0.092519	0.112497	0.066332	0.219534	0.204752	0.157299	0.157051	0.341178	0.200133	0.472442	0.592086	0.191755	0.0356665	0.222529	0.500514	0.622171	0.229073	0.174314	0.301362	0.274013	0.145745	0.247968	0.41467	0.407379	0.462718	0.267808
4.8	0.209794	0.158715	35		4.8	0.179296	0.104996	-0.0841902	0.0551384	0.0635677	0.11753	0.0488965	0.0702206	0.0370434	0.0863952	0.106203	0.066494	0.208975	0.196099	0.16103	0.151611	0.316652	0.182374	0.451034	0.570706	0.171413	0.034298	0.209113	0.481684	0.60473	0.211981	0.160521	0.278919	0.252081	0.129863	0.232989	0.39539	0.384501	0.445813	0.259424
5.1	0.199838	0.151369	35		5.1	0.178363	0.0347163	-0.0289203	0.0661661	0.0635678	0.113289	0.0453603	0.0694981	0.0360197	0.0841788	0.109407	0.0648208	0.210148	0.19111	0.148098	0.139728	0.295077	0.173991	0.425794	0.550889	0.156868	0.0226518	0.203839	0.464003	0.584502	0.19322	0.151724	0.257573	0.233458	0.11827	0.213444	0.376839	0.369939	0.429673	0.247014
5.4	0.192315	0.143182	35		5.4	0.145255	0.0821338	0.0115681	0.0563116	0.0524434	0.10772	0.0461732	0.0678272	0.0359984	0.0826707	0.103799	0.0614206	0.210588	0.187682	0.139393	0.155762	0.272623	0.166509	0.404811	0.530332	0.133681	0.0157224	0.184792	0.442753	0.567879	0.182273	0.147854	0.241896	0.21921	0.108973	0.201327	0.359088	0.352435	0.415602	0.23653
5.7	0.177791	0.143952	35		5.7	0.0809046	-0.0381033	-0.039203	0.0680432	0.0683353	0.100544	0.0439784	0.0658403	0.0367874	0.0779636	0.103113	0.0616364	0.207215	0.182929	0.14188	0.139871	0.255484	0.163999	0.382836	0.512632	0.117192	0.0118209	0.168425	0.424951	0.549245	0.167989	0.132372	0.223538	0.206617	0.0993972	0.189576	0.343796	0.337655	0.404406	0.229022
L284F	Average	SD	n
Time constant	0.35413	0.306966	35		Time constant	0.0768105	0.056335	0.052943	0.035481	0.0572163	0.230972	0.112543	0.152953	0.14391	0.150861	0.160721	0.0966391	0.0866383	0.1114	0.209977	0.284789	0.58589	0.123513	1.0692	1.45119	0.4794	0.252249	0.365725	0.775212	0.711267	0.45304	0.291164	0.558886	0.487036	0.326049	0.436625	0.60506	0.598053	0.528559	0.276242
Rate constant	6.30283	6.1875	35		Rate constant	13.0191	17.751	18.8882	28.1841	17.4775	4.32953	8.88549	6.53796	6.94879	6.62862	6.22196	10.3478	11.5422	8.97666	4.76243	3.51137	1.70681	8.09631	0.935279	0.68909	2.08594	3.96434	2.73429	1.28997	1.40594	2.20731	3.43449	1.78927	2.05324	3.06702	2.29029	1.65273	1.67209	1.89194	3.62001
Qoff charge	34.2808	17.1104	35		Qoff charge	84.5777	48.3809	52.7387	8.77785	24.5392	43.8762	61.6846	42.5959	70.6487	42.3084	25.9253	41.0706	7.17969	21.1245	23.0796	24.0073	23.8124	29.6403	18.406	16.2709	19.8761	23.7981	25.7933	12.6796	20.4486	39.3077	55.0397	47.0822	45.237	31.1724	34.7614	37.5282	36.3361	42.7738	17.3485
t-test vsWT	p	0.00489661
L248Y						Cell
Time(sec)	Average	SD	n		Time(sec)	1	2	3	4	5	6	7	8	9	10	11	12	13
0	1	0	13		0	1	1	1	1	1	1	1	1	1	1	1	1	1
0.3	0.67145	0.166851	13		0.3	0.616044	0.684491	0.580628	0.459237	0.595095	0.733059	0.31403	0.814416	0.597141	0.884026	0.903099	0.87928	0.668305
0.6	0.423659	0.242781	13		0.6	0.255057	0.391094	0.300547	0.0773239	0.256969	0.478616	0.0536069	0.641132	0.298722	0.779098	0.815946	0.724772	0.434685
0.9	0.307399	0.228629	13		0.9	0.208776	0.205138	0.17537	0.0566482	0.10287	0.290619	0.0271343	0.47228	0.149172	0.695961	0.732105	0.580765	0.299345
1.2	0.236758	0.210489	13		1.2	0.157353	0.097393	0.114061	0.0531182	0.0471841	0.176238	0.0221708	0.365108	0.0898813	0.627401	0.659496	0.451412	0.217035
1.5	0.191747	0.192283	13		1.5	0.104217	0.0654234	0.0973006	0.0223567	0.0330573	0.10684	0.0380543	0.280546	0.0524843	0.573799	0.599071	0.346346	0.173219
1.8	0.152555	0.182458	13		1.8	-0.00959889	0.0417888	0.0718948	0.00235334	0.0262942	0.073617	0.0203508	0.21977	0.0377373	0.528396	0.543101	0.27088	0.156634
2.1	0.13035	0.169439	13		2.1	0.0462804	0.0439581	0.0228476	-0.036981	0.0284432	0.0388124	0.0162144	0.192729	0.02628	0.486561	0.503198	0.210938	0.115274
2.4	0.119217	0.153084	13		2.4	0.0157696	0.0379448	0.0356387	0.0132795	0.0298654	0.0336972	0.00860358	0.161527	0.0233684	0.45137	0.462839	0.165555	0.11036
2.7	0.112075	0.139302	13		2.7	0.0428523	0.0405709	0.0146436	0.0262229	0.0255041	0.0253124	0.0294507	0.139369	0.0264312	0.421001	0.427848	0.131704	0.106061
3	0.108687	0.127898	13		3	0.0891327	0.0396955	0.042343	0.0242057	0.0258201	0.018457	0.0254798	0.127611	0.0271875	0.393782	0.401005	0.107096	0.0911138
3.3	0.0856079	0.128867	13		3.3	0.0246829	0.0342531	0.00749824	-0.0324424	0.0253145	0.0213046	-0.016049	0.112508	0.0235574	0.371764	0.376866	0.0880922	0.0755528
3.6	0.0863538	0.11869	13		3.6	-0.0503942	0.0381732	0.0336097	0.0215162	0.0227862	0.0191425	0.0448379	0.10681	0.0274522	0.348493	0.35482	0.0748865	0.0804668
3.9	0.080706	0.110412	13		3.9	0.0335962	0.0288107	0.00582216	-0.0279038	0.0216484	0.0207246	0.0392124	0.0915257	0.0283219	0.32974	0.330224	0.0659645	0.0814906
4.2	0.0825034	0.101311	13		4.2	0.0140555	0.0336822	0.0345801	0.0366448	0.0275583	0.0199863	0.0254798	0.0935154	0.0285109	0.31334	0.316555	0.0610687	0.0675676
4.5	0.0828865	0.0945326	13		4.5	0.0750771	0.0413701	0.0392555	0.0213481	0.0267998	0.0208828	0.0316016	0.0822104	0.0143689	0.29732	0.30083	0.0552066	0.0712531
4.8	0.064205	0.0990229	13		4.8	-0.0123414	0.0347098	0.0298165	-0.0358043	0.0251248	0.02083	-0.0145599	0.085828	0.0264312	0.282932	0.287618	0.0516636	0.0524161
5.1	0.0738971	0.0864177	13		5.1	0.022626	0.0345956	0.0250529	0.0379896	0.0227862	0.0130254	0.0380543	0.0749751	0.0246918	0.269683	0.274558	0.0491191	0.0735053
5.4	0.0739792	0.0811496	13		5.4	0.0445663	0.0415985	0.0440191	0.031602	0.0186145	0.0182461	0.0398743	0.0724428	0.0255237	0.260307	0.262489	0.047573	0.0548731
5.7	0.0747931	0.0763054	13		5.7	0.0500514	0.040647	0.0336097	0.0556396	0.0238291	0.0155039	0.0398743	0.0787736	0.0273387	0.247058	0.252627	0.048185	0.0591728
L248Y	Average	SD	n
Time constant	0.140416	0.10004	13		Time constant	0.0835413	0.093197	0.0825098	0.0526047	0.07285	0.118948	0.0383985	0.174292	0.08001	0.331641	0.360782	0.226023	0.110608
Rate constant	10.7303	6.29038	13		Rate constant	11.9701	10.73	12.1198	19.0097	13.7268	8.40704	26.0427	5.7375	12.4984	3.01531	2.77176	4.42433	9.04094
Qoff charge	68.0295	39.1329	13		Qoff charge	59.1508	67.9799	110.582	127.187	94.819	61.0628	109.763	9.91934	120.42	26.2156	17.6201	42.0335	37.6306
t-test vsWT	p	0.000951835
L284W						Cell
Time(sec)	Average	SD	n		Time(sec)	1	2	3	4	5	6	7	8	9	10	11	12	13
0	1	0	13		0	1	1	1	1	1	1	1	1	1	1	1	1	1
0.3	0.706045	0.142932	13		0.3	0.791655	0.554126	0.442652	0.767071	0.721499	0.665007	0.705876	0.72753	0.500396	0.646336	0.900736	0.785943	0.969761
0.6	0.484813	0.206425	13		0.6	0.571705	0.246196	0.16873	0.561065	0.468727	0.381223	0.470567	0.495637	0.244952	0.405779	0.807464	0.54786	0.932659
0.9	0.354355	0.219019	13		0.9	0.405176	0.113881	0.107817	0.416763	0.300458	0.214003	0.30928	0.342915	0.142735	0.265841	0.724635	0.376264	0.886845
1.2	0.272088	0.220952	13		1.2	0.293175	0.0692194	0.0502814	0.320339	0.197693	0.132488	0.204743	0.235313	0.0902732	0.181115	0.65035	0.268937	0.843223
1.5	0.224422	0.2113	13		1.5	0.214286	0.0705184	0.056035	0.256198	0.140138	0.0872451	0.146281	0.173594	0.0700145	0.1258	0.589652	0.193445	0.794277
1.8	0.189844	0.202764	13		1.8	0.174127	0.0308054	0.0487805	0.205336	0.103652	0.0729414	0.102674	0.137022	0.0576745	0.104644	0.541177	0.145095	0.744049
2.1	0.167224	0.190312	13		2.1	0.136962	0.0458988	0.0764228	0.16958	0.0824708	0.0511301	0.08369	0.111111	0.0293652	0.0813209	0.50089	0.11296	0.692113
2.4	0.151005	0.177983	13		2.4	0.11214	0.0480638	0.0629143	0.144545	0.0647642	0.0449265	0.0667707	0.094152	0.0448067	0.0810114	0.466299	0.088337	0.644334
2.7	0.135292	0.167905	13		2.7	0.0927973	0.0522083	0.051157	0.12085	0.0600695	0.0369844	0.0583111	0.0803419	0.0278474	0.0655315	0.439184	0.0757052	0.597808
3	0.122839	0.15603	13		3	0.0849222	0.0420636	0.0242652	0.105196	0.0526394	0.0424372	0.0473337	0.0746739	0.0434869	0.0569659	0.403287	0.0649938	0.554641
3.3	0.116947	0.143517	13		3.3	0.0763102	0.0450328	0.0502814	0.0989219	0.0536744	0.041963	0.0545345	0.0643275	0.0330606	0.0552116	0.37991	0.0550932	0.511987
3.6	0.10571	0.13503	13		3.6	0.0625864	0.0520846	0.0132583	0.0916733	0.0488688	0.0428323	0.0492975	0.054386	0.036558	0.0386997	0.364721	0.0512952	0.467967
3.9	0.0994257	0.125328	13		3.9	0.0571521	0.0489299	0.0236398	0.0899068	0.038925	0.0351667	0.0509593	0.051417	0.0407153	0.0341589	0.341462	0.0454487	0.434653
4.2	0.0955197	0.116548	13		4.2	0.0490928	0.0530125	0.052783	0.0822928	0.0449505	0.0339023	0.0392769	0.0447593	0.0332585	0.0351909	0.327459	0.0429309	0.402847
4.5	0.0938529	0.105485	13		4.5	0.0538823	0.0482494	0.0474046	0.0735214	0.0439154	0.0405801	0.0516139	0.0510121	0.0435529	0.0509804	0.308829	0.0375539	0.368992
4.8	0.0842163	0.101055	13		4.8	0.0524086	0.0285785	0.019137	0.0673692	0.0412908	0.045045	0.0398308	0.0518668	0.0432889	0.0314757	0.297259	0.0368284	0.340433
5.1	0.0893278	0.091424	13		5.1	0.0493691	0.0538785	0.0765478	0.0761406	0.0437676	0.0453612	0.0404351	0.0501125	0.0358321	0.0464396	0.283375	0.0408398	0.319163
5.4	0.0832903	0.084678	13		5.4	0.0433821	0.0594458	0.0516573	0.0618262	0.048684	0.0403035	0.0437081	0.0477733	0.0417712	0.0463364	0.267592	0.0361883	0.294106
5.7	0.0801753	0.0805411	13		5.7	0.0374413	0.0472597	0.0485303	0.0625571	0.0457637	0.0429904	0.0511103	0.0497526	0.0376138	0.0447884	0.261006	0.0378099	0.275655
L284W	Average	SD	n
Time constant	0.172406	0.165998	13		Time constant	0.153283	0.0671415	0.0525463	0.155867	0.116611	0.0943034	0.117687	0.128213	0.067125	0.104205	0.346631	0.144577	0.693086
Rate constant	9.08301	4.69456	13		Rate constant	6.52388	14.8939	19.0308	6.41573	8.57552	10.6041	8.49712	7.79952	14.8976	9.59647	2.88491	6.91673	1.44282
Qoff charge	53.2534	20.7087	13		Qoff charge	52.9665	89.7092	81.967	50.8603	60.1556	57.6871	45.5336	51.076	79.232	44.8686	19.4186	40.7473	18.0718
t-test vsWT	p	0.000589647
[truncated: 1 more columns]
