# Supplementary material for: The hydrophobic nature of a novel membrane interface regulates the enzyme activity of a voltage-sensing phosphatase
Source: eLife. 2018 Nov 28;7:e41653. doi: 10.7554/eLife.41653 (PMC6298786; doi:10.7554/eLife.41653)
Supplement: Figure 7—source data 1. [file elife-41653-fig7-data1.xlsx]

## Sheet: Figure7
Figure7-souce data
Figure7B
Malachite Green Assay
Relative Activity					Relative Activity
Ci-VSP	Average	SD	n		Ci-VSP	1	2	3	4	5	6	7	8	9
WT	100	0	9		WT	100	100	100	100	100	100	100	100	100
L284F	85.627	21.7667	9		L284F	84.1553	139.552	85.2654	64.4581	64.6959	67.9341	91.9248	78.7798	93.8776
L284Q	25.1562	11.1642	9		L284Q	37.4607	30.597	41.3868	9.03905	10.8108	20.5585	36.7257	18.9655	20.8617
F285Q	11.9373	8.65352	9		F285Q	7.81742	19.5896	18.6349	-2.67661	7.05236	16.3863	23.5619	16.8435	0.226757
hPTEN	Average	SD	n		hPTEN	1	2	3	4	5	6	7	8	9
WT	100	0	7		WT	100	100	100	100	100	100	100
V45F	94.2403	6.52376	7		V45F	80.1687	91.3902	97.0991	98.1541	102.206	96.4405	94.2237
V45Q	100.153	12.0989	7		V45Q	107.436	106.516	123.973	89.9611	93.4389	91.1846	88.5602
Y46Q	48.4825	12.4965	7		Y46Q	28.5049	30.8891	62.6511	57.351	52.7998	57.7308	49.4505
