# Supplementary material for: The hydrophobic nature of a novel membrane interface regulates the enzyme activity of a voltage-sensing phosphatase
Source: eLife. 2018 Nov 28;7:e41653. doi: 10.7554/eLife.41653 (PMC6298786; doi:10.7554/eLife.41653)
Supplement: Figure 8—source data 1. [file elife-41653-fig8-data1.xlsx]

## Sheet: Sheet1
Figure8-souce data
Figure8B
Ci-VSP G214C-TMRM
WT							Cell
	Normalized dF/F	average	SD	n		Voltage	1	2	3	4	5
	-60	0	0	6		-60	0	0	0	0	0	0
	-50	0.0062308	0.00383581	6		-50	0.0023755	0.00925646	0.00435667	0.00116803	0.0116887	0.00853939
	-40	0.00154174	0.00286724	6		-40	0.000422431	0.00265805	0.00253567	0.00413964	0.00378778	-0.00429313
	-30	-0.0102894	0.00965497	6		-30	-0.0047232	-0.00973458	-0.0303772	-0.00498818	-0.000531971	-0.0113811
	-20	-0.0148989	0.0102469	6		-20	-0.0107994	-0.0194435	-0.0304077	-0.00970794	0.00204014	-0.0210747
	-10	-0.0324616	0.0089929	6		-10	-0.0291987	-0.0390427	-0.0426054	-0.0239622	-0.0189389	-0.0410218
	0	-0.0540644	0.00922875	6		0	-0.0437637	-0.0596843	-0.0642666	-0.0436941	-0.0478299	-0.0651475
	10	-0.0719975	0.0116779	6		10	-0.0684516	-0.0804687	-0.0748188	-0.0595109	-0.0576522	-0.0910826
	20	-0.106647	0.0133491	6		20	-0.102268	-0.117747	-0.11706	-0.0915867	-0.0884425	-0.122776
	30	-0.144904	0.0220426	6		30	-0.150335	-0.174094	-0.149399	-0.117814	-0.114321	-0.16346
	40	-0.199497	0.0286072	6		40	-0.19664	-0.239646	-0.201363	-0.156327	-0.174905	-0.228102
	50	-0.258016	0.0350142	6		50	-0.261145	-0.304207	-0.272629	-0.201201	-0.224912	-0.284001
	60	-0.343812	0.0530334	6		60	-0.356487	-0.414854	-0.357898	-0.262807	-0.286595	-0.384231
	70	-0.447189	0.072093	6		70	-0.467065	-0.538551	-0.475928	-0.336844	-0.365285	-0.49946
	80	-0.575003	0.0861143	6		80	-0.60556	-0.669982	-0.61718	-0.44246	-0.472054	-0.642784
	90	-0.700097	0.0962198	6		90	-0.736349	-0.798756	-0.772087	-0.567244	-0.565791	-0.760355
	100	-0.803668	0.0882526	6		100	-0.839256	-0.88429	-0.874188	-0.693251	-0.668331	-0.862691
	110	-0.881637	0.0745081	6		110	-0.912571	-0.945154	-0.946784	-0.802024	-0.756392	-0.926901
	120	-0.936507	0.0604716	6		120	-0.95863	-0.984973	-0.995183	-0.881353	-0.829196	-0.969705
	130	-0.966133	0.046311	6		130	-0.984917	-1.00569	-1.01778	-0.929183	-0.883513	-0.975719
	140	-0.988665	0.0336313	6		140	-1.00319	-1.01813	-1.03332	-0.963678	-0.933787	-0.979884
	150	-0.998809	0.0279196	6		150	-1.00965	-1.01294	-1.04089	-0.978497	-0.952159	-0.998711
	160	-1.00218	0.0228999	6		160	-1.01177	-1.00998	-1.04176	-0.99373	-0.968457	-0.987397
	170	-1.0069	0.0190896	6		170	-1.01216	-1.01177	-1.04204	-0.994527	-0.980296	-1.0006
	180	-1.00482	0.0164195	6		180	-1.0102	-1.00126	-1.038	-0.999692	-0.988926	-0.99082
	190	-1.00392	0.014234	6		190	-1.00424	-1.00293	-1.0333	-1.00142	-0.989725	-0.991934
	200	-1	0	6		200	-1	-1	-1	-1	-1	-1
L284F							Cell
	Normalized dF/F	average	SD	n		Voltage	1	2	3	4	5	6
	-60	0	0	6		-60	0	0	0	0	0	0
	-50	0.00445865	0.0015953	6		-50	0.00586843	0.00619037	0.00220365	0.00415266	0.00573943	0.00259734
	-40	0.00288691	0.00589215	6		-40	0.0079104	0.00699909	0.00306143	0.00567216	0.00336687	-0.0096885
	-30	-0.00249004	0.00763529	6		-30	0.00257124	0.000488498	-0.00197021	0.00113179	-0.0192512	0.00208965
	-20	-0.00723403	0.0114035	6		-20	0.0132889	-0.00847111	-0.00911503	-0.0105936	-0.0253034	-0.00320987
	-10	-0.0190905	0.0125479	6		-10	0.00645134	-0.0218305	-0.0197993	-0.0279912	-0.0333697	-0.0180035
	0	-0.0360134	0.00997756	6		0	-0.0194827	-0.0387629	-0.0345067	-0.0340181	-0.0536239	-0.0356861
	10	-0.0613131	0.0172201	6		10	-0.0422055	-0.0597324	-0.0615457	-0.0539482	-0.0972495	-0.0531972
	20	-0.088958	0.0152431	6		20	-0.061538	-0.0894654	-0.0886418	-0.092642	-0.113981	-0.0874798
	30	-0.132304	0.0229789	6		30	-0.0929364	-0.132827	-0.132702	-0.137981	-0.171588	-0.125786
	40	-0.185676	0.0265649	6		40	-0.151167	-0.179779	-0.190886	-0.190659	-0.236139	-0.165428
	50	-0.2581	0.029474	6		50	-0.213527	-0.252972	-0.272508	-0.27194	-0.304672	-0.232978
	60	-0.36198	0.0301455	6		60	-0.319613	-0.362149	-0.3842	-0.383003	-0.398345	-0.324571
	70	-0.50712	0.0358843	6		70	-0.460655	-0.511567	-0.534307	-0.527425	-0.551186	-0.457581
	80	-0.659787	0.037032	6		80	-0.612269	-0.677872	-0.686218	-0.680442	-0.697664	-0.604259
	90	-0.794398	0.0324881	6		90	-0.766225	-0.807999	-0.822154	-0.803345	-0.82948	-0.737188
	100	-0.887599	0.0211287	6		100	-0.866389	-0.901108	-0.909749	-0.895613	-0.90126	-0.851479
	110	-0.947049	0.0121306	6		110	-0.938462	-0.952106	-0.962118	-0.951546	-0.953312	-0.924754
	120	-0.978071	0.0147074	6		120	-0.978268	-0.984401	-0.995636	-0.981207	-0.981319	-0.947594
	130	-0.998809	0.0104237	6		130	-0.99799	-1.00167	-1.00148	-1.00119	-1.01266	-0.977868
	140	-1.00513	0.00720096	6		140	-1.00644	-1.00502	-1.00459	-1.00945	-1.01444	-0.990856
	150	-1.01144	0.0051471	6		150	-1.01067	-1.01856	-1.01141	-1.0116	-1.01476	-1.00161
	160	-1.00825	0.00190617	6		160	-1.01098	-1.0093	-1.00542	-1.00711	-1.00975	-1.00693
	170	-1.00713	0.0118806	6		170	-1.00793	-1.00047	-1.00235	-1.0031	-1.03256	-0.996357
	180	-1.00419	0.00665957	6		180	-1.01123	-1.00845	-0.995633	-0.998515	-1.01232	-0.998992
	190	-1.00359	0.0087073	6		190	-1.00584	-1.00733	-0.994354	-0.997359	-1.01988	-0.996775
	200	-1	0	6		200	-1	-1	-1	-1	-1	-1
L284Q							Cell
	Normalized dF/F	average	SD	n		Voltage	1	2	3	4	5	6
	-60	0	0	6		-60	0	0	0	0	0	0
	-50	0.00559365	0.00308545	6		-50	0.0112317	0.00504896	0.00639192	0.00125037	0.00334706	0.00629192
	-40	0.00119028	0.00540417	6		-40	0.0107216	0.00346731	0.00336762	-0.00574663	-0.00319866	-0.00146956
	-30	-0.00771816	0.00682542	6		-30	0.00424164	-0.00485038	-0.00405858	-0.0130999	-0.0143828	-0.0141589
	-20	-0.0233023	0.00935733	6		-20	-0.00735256	-0.0180586	-0.0203946	-0.0270585	-0.0308336	-0.0361157
	-10	-0.044173	0.013569	6		-10	-0.0221539	-0.0363415	-0.0369421	-0.0514708	-0.056891	-0.0612388
	0	-0.0744343	0.0165561	6		0	-0.0482645	-0.063466	-0.0689857	-0.0783024	-0.0890372	-0.0985501
	10	-0.112268	0.0209944	6		10	-0.0771059	-0.103427	-0.10598	-0.113889	-0.129409	-0.143797
	20	-0.160186	0.0238768	6		20	-0.118588	-0.150957	-0.156935	-0.159551	-0.180573	-0.194514
	30	-0.215571	0.0267379	6		30	-0.168038	-0.205438	-0.216232	-0.21204	-0.239435	-0.252246
	40	-0.277892	0.0277518	6		40	-0.229621	-0.270539	-0.280648	-0.266848	-0.304156	-0.315541
	50	-0.347417	0.0299463	6		50	-0.29663	-0.344395	-0.353567	-0.327163	-0.377011	-0.385736
	60	-0.423179	0.0304109	6		60	-0.373931	-0.421625	-0.430593	-0.397842	-0.45193	-0.46315
	70	-0.499923	0.0321787	6		70	-0.452506	-0.501927	-0.506871	-0.465224	-0.532539	-0.540473
	80	-0.579848	0.0318446	6		80	-0.537575	-0.587912	-0.582504	-0.539467	-0.613891	-0.61774
	90	-0.657884	0.0296595	6		90	-0.624885	-0.671162	-0.656311	-0.614308	-0.692229	-0.688411
	100	-0.731607	0.0257023	6		100	-0.710814	-0.746268	-0.725183	-0.68991	-0.764419	-0.75305
	110	-0.797149	0.0233006	6		110	-0.786427	-0.812032	-0.785752	-0.757272	-0.827455	-0.813958
	120	-0.852556	0.0200915	6		120	-0.847982	-0.864377	-0.837564	-0.819456	-0.880284	-0.865675
	130	-0.895404	0.0175911	6		130	-0.894206	-0.905628	-0.878625	-0.86808	-0.920271	-0.905613
	140	-0.929744	0.0148435	6		140	-0.929965	-0.935672	-0.911265	-0.91034	-0.951322	-0.939902
	150	-0.955111	0.0124172	6		150	-0.955147	-0.959346	-0.938209	-0.940739	-0.973632	-0.963592
	160	-0.973985	0.00857805	6		160	-0.973926	-0.976572	-0.961822	-0.965105	-0.987521	-0.978963
	170	-0.987065	0.00582288	6		170	-0.989105	-0.988508	-0.977682	-0.981621	-0.99549	-0.989984
	180	-0.994614	0.00410564	6		180	-0.996012	-0.995621	-0.988715	-0.990249	-1.00114	-0.995949
	190	-0.998691	0.00135262	6		190	-0.999044	-0.999538	-0.997524	-0.997354	-1.00109	-0.997591
	200	-1	0	6		200	-1	-1	-1	-1	-1	-1
F285Q							Cell
	Normalized dF/F	average	SD	n		Voltage	1	2	3	4	5	6
	-60	0	0	6		-60	0	0	0	0	0	0
	-50	0.0120822	0.00432329	6		-50	0.00546012	0.0119957	0.020257	0.0113749	0.0122817	0.0111238
	-40	0.0154856	0.00721643	6		-40	0.011417	0.0158513	0.0289533	0.00773908	0.00936031	0.0195925
	-30	0.0133515	0.0105039	6		-30	0.0162806	0.0151503	0.03344	0.00184689	0.0102779	0.00311329
	-20	0.00406646	0.00996913	6		-20	0.0104313	0.00603522	0.020702	-0.00111138	-0.000705069	-0.0109533
	-10	-0.00968349	0.0136465	6		-10	-0.00148823	0.00197854	0.00880149	-0.0263391	-0.0150527	-0.0260009
	0	-0.0316922	0.00991609	6		0	-0.0228672	-0.0266212	-0.0220209	-0.0506526	-0.0306238	-0.0373671
	10	-0.0524252	0.0158697	6		10	-0.0384321	-0.0368817	-0.036709	-0.0751332	-0.0583652	-0.0690303
	20	-0.091717	0.019018	6		20	-0.0757826	-0.0691819	-0.0870439	-0.122244	-0.0843309	-0.111719
	30	-0.13883	0.0192596	6		30	-0.115408	-0.119421	-0.132732	-0.170327	-0.139829	-0.155263
	40	-0.186193	0.0250982	6		40	-0.171024	-0.158264	-0.177363	-0.230727	-0.171441	-0.208341
	50	-0.244692	0.0298	6		50	-0.218503	-0.221763	-0.228521	-0.303448	-0.234148	-0.26177
	60	-0.31518	0.0319821	6		60	-0.291911	-0.282962	-0.303232	-0.374273	-0.298278	-0.340425
	70	-0.38625	0.0358944	6		70	-0.361117	-0.35472	-0.363119	-0.454549	-0.371519	-0.412477
	80	-0.468366	0.0349871	6		80	-0.452713	-0.432477	-0.464311	-0.540454	-0.444914	-0.475327
	90	-0.539189	0.0366376	6		90	-0.53483	-0.516943	-0.518894	-0.619168	-0.513049	-0.532248
	100	-0.611468	0.0372677	6		100	-0.603719	-0.591302	-0.612354	-0.691752	-0.585865	-0.583815
	110	-0.679356	0.0369395	6		110	-0.683915	-0.675293	-0.683219	-0.751141	-0.647725	-0.634843
	120	-0.746366	0.0368458	6		120	-0.760242	-0.746668	-0.757084	-0.808101	-0.714769	-0.691333
	130	-0.804056	0.0351287	6		130	-0.813394	-0.806063	-0.824251	-0.858683	-0.771187	-0.750758
	140	-0.853456	0.0349426	6		140	-0.866503	-0.858784	-0.874261	-0.901153	-0.827987	-0.792049
	150	-0.896051	0.0316195	6		150	-0.909965	-0.904139	-0.917321	-0.935439	-0.867359	-0.842082
	160	-0.928801	0.0279496	6		160	-0.939131	-0.929186	-0.946867	-0.965935	-0.914588	-0.877101
	170	-0.958886	0.0263316	6		170	-0.964429	-0.951948	-0.99013	-0.987153	-0.947397	-0.91226
	180	-0.97781	0.0194236	6		180	-0.990889	-0.987238	-0.985814	-0.997907	-0.9638	-0.941211
	190	-0.989968	0.013723	6		190	-0.989979	-0.989265	-1.00122	-1.00894	-0.985362	-0.965038
	200	-1	0	6		200	-1	-1	-1	-1	-1	-1
