# Supplementary material for: The hydrophobic nature of a novel membrane interface regulates the enzyme activity of a voltage-sensing phosphatase
Source: eLife. 2018 Nov 28;7:e41653. doi: 10.7554/eLife.41653 (PMC6298786; doi:10.7554/eLife.41653)
Supplement: Figure 9—source data 1. [file elife-41653-fig9-data1.xlsx]

## Sheet: Sheet1
Figure9 -source data
Figure9B,C
CiVSP K555Anap
WT							Cell
	Normalized dF/F	average	SD	n		Voltage	1	2	3	4	5	6	7
	-60	0.0171972	0.0244553	7		-60	0.0175319	0.0330871	0.0291418	0.0192635	-0.0301496	-0.000692857	0.0521986
	-40	-0.00555801	0.0200602	7		-50	-0.00524961	0.0133212	-0.0386177	0.0137454	0.00574186	0.00514385	-0.032991
	-20	-0.0334947	0.0419891	7		-40	-0.0316963	-0.0517592	-0.0328786	-0.0638551	0.0242652	0.0226971	-0.101236
	0	-0.0894677	0.0438977	7		-30	-0.0261588	-0.140911	-0.0545233	-0.0722633	-0.105669	-0.0691475	-0.157601
	20	-0.174389	0.0877986	7		-20	-0.0234425	-0.197891	-0.294397	-0.256804	-0.180698	-0.0785857	-0.188905
	40	-0.303073	0.128967	7		-10	-0.0745349	-0.383875	-0.44493	-0.448838	-0.283502	-0.177048	-0.308786
	60	-0.265329	0.209439	7		0	0.060811	-0.291601	-0.428267	-0.594227	-0.185357	-0.0471501	-0.371512
	80	0.132114	0.288599	7		10	0.45061	0.214549	0.411397	-0.0605802	0.289609	0.0614324	-0.44222
	100	1.09097	0.747511	7		20	1.16747	1.48221	2.35129	1.57199	0.662193	0.487259	-0.0856293
	120	2.18782	1.38411	7		30	1.72789	2.62572	4.47062	3.75833	1.27775	1.06967	0.38478
	140	3.19668	1.88646	7		40	2.07121	3.66486	6.08426	5.7891	2.13845	1.59822	1.03069
	160	3.89871	2.19633	7		50	2.23914	4.122	6.97315	7.36944	2.89695	1.96187	1.72842
	180	4.36016	2.41048	7		60	2.34881	4.33818	7.57056	8.39315	3.4195	2.0574	2.39349
	Qoff (nC)	51.1933	21.1015	7		Qoff	58.8593	59.086	76.3116	76.181	16.851	29.591	41.473
L284F							Cell
	Normalized dF/F	average	SD	n		Voltage	1	2	3	4	5	6	7
	-60	-0.00489106	0.0178458	7		-60	0.00743866	0.00658273	-0.0233886	0.0191456	-0.036194	0.000775613	-0.00859745
	-40	-0.00111829	0.0166998	7		-50	-0.0242283	-0.00297171	0.00952984	0.0252694	0.00107904	-0.0240384	0.00753213
	-20	-0.0438219	0.0504943	7		-40	-0.0369845	0.0288053	-0.0231354	0.0114993	-0.0776331	-0.0889371	-0.120368
	0	-0.135545	0.05728	7		-30	-0.131095	-0.0821033	-0.15595	-0.027327	-0.160112	-0.1995	-0.192728
	20	-0.269213	0.078696	7		-20	-0.262135	-0.171094	-0.302404	-0.134914	-0.326665	-0.352502	-0.334774
	40	-0.361522	0.137644	7		-10	-0.256178	-0.235199	-0.319214	-0.190987	-0.492854	-0.453282	-0.582941
	60	-0.220062	0.269467	7		0	0.151272	-0.0172908	-0.087688	-0.126326	-0.370176	-0.359206	-0.731021
	80	0.913606	0.62595	7		10	1.99021	1.30973	0.807631	0.662835	1.14231	0.686338	-0.203815
	100	3.19541	1.18704	7		20	5.29065	3.93963	2.97702	2.45515	3.81653	2.58021	1.30871
	120	5.27853	1.48562	7		30	7.89988	5.88229	5.0179	4.18629	6.35652	4.6515	2.95533
	140	6.57175	1.62116	7		40	9.43659	6.9336	6.28863	5.14946	7.95206	6.08037	4.16156
	160	7.25524	1.68353	7		50	10.1735	7.37833	6.99004	5.61552	8.86872	6.92075	4.83981
	180	7.57806	1.75852	7		60	10.5171	7.71108	7.34707	5.76149	9.33241	7.35035	5.02692
	Qoff	34.4755	4.76756	7		Qoff	42.7602	30.9568	31.6398	34.7445	33.833	27.851	39.543
L284Q							Cell
	Normalized dF/F	average	SD	n		Voltage	1	2	3	4
	-60	-0.00355193	0.0349003	4		-60	-0.0360275	-0.0319312	0.00278794	0.050963
	-40	-0.0247645	0.0139733	4		-50	-0.0107336	-0.0197108	-0.0205866	-0.0480271
	-20	-0.0466415	0.0604543	4		-40	-0.0199971	0.0397057	-0.0972381	-0.109036
	0	-0.138231	0.0949444	4		-30	-0.130647	0.00156804	-0.159027	-0.264817
	20	-0.300363	0.230291	4		-20	-0.0911091	-0.0554081	-0.476518	-0.578418
	40	-0.63026	0.354787	4		-10	-0.273531	-0.294519	-0.867503	-1.08549
	60	-0.921094	0.628957	4		0	-0.328005	-0.298063	-1.30227	-1.75604
	80	-1.27626	0.794665	4		10	-0.659346	-0.360796	-1.78435	-2.30055
	100	-1.50658	0.874597	4		20	-0.783483	-0.549279	-2.02389	-2.66967
	120	-1.60945	0.954339	4		30	-0.816938	-0.6085	-2.0563	-2.95607
	140	-1.66405	0.987679	4		40	-0.906128	-0.562862	-2.15383	-3.03339
	160	-1.71441	1.02484	4		50	-0.885741	-0.615642	-2.20394	-3.15231
	180	-1.75336	1.06866	4		60	-0.99396	-0.549195	-2.18124	-3.28905
	Qoff	26.5101	9.36585	4		Qoff	17.0713	18.1789	39.548	31.242
F285Q							Cell
	Normalized dF/F	average	SD	n		Voltage	1	2	3
	-60	0.032305	0.0399731	3		-60	0.0865181	0.0190721	-0.00867519
	-40	0.00553009	0.0421349	3		-50	0.0586616	0.00232678	-0.0443981
	-20	-0.0525957	0.0304347	3		-40	-0.0584209	-0.0127513	-0.086615
	0	-0.0815601	0.0627751	3		-30	-0.110927	0.00567857	-0.139432
	20	-0.202635	0.0962685	3		-20	-0.230282	-0.0733636	-0.304259
	40	-0.280307	0.125209	3		-10	-0.358952	-0.10359	-0.37838
	60	-0.429786	0.223032	3		0	-0.690189	-0.14545	-0.453718
	80	-0.59998	0.365391	3		10	-1.07164	-0.181343	-0.546957
	100	-0.685772	0.418834	3		20	-1.25589	-0.261584	-0.539843
	120	-0.733631	0.406321	3		30	-1.28874	-0.327485	-0.584668
	140	-0.781117	0.478805	3		40	-1.4128	-0.254056	-0.676496
	160	-0.789249	0.471591	3		50	-1.42959	-0.307616	-0.63054
	180	-0.77948	0.434966	3		60	-1.35285	-0.299848	-0.685741
	Qoff	15.9303	4.38281	3		Qoff	18.6066	19.4339	9.75052
