# Supplementary material for: The hydrophobic nature of a novel membrane interface regulates the enzyme activity of a voltage-sensing phosphatase
Source: eLife. 2018 Nov 28;7:e41653. doi: 10.7554/eLife.41653 (PMC6298786; doi:10.7554/eLife.41653)
Supplement: Figure 10—source data 1. [file elife-41653-fig10-data1.xlsx]

## Sheet: Sheet1
Figure10-souce data
Figure 10
Ci-VSP G214C-TMRM
WT
FittingParameter			two Boltsman distributuions
		average	SD				Cell	1	2	3	4	5	6
	A1	-0.772132	0.0671572	6			A1	-0.800036	-0.687487	-0.741478	-0.82108	-0.87808	-0.70463
	A2	-0.248123	0.0726792	6			A2	-0.216314	-0.3328	-0.311826	-0.18831	-0.13529	-0.3042
	slope1	15.6973	2.80811	6			slope1	15.0412	13.7011	13.7745	16.263	21.629	13.775
	slope2	21.2049	2.63853	6			slope2	18.4065	20.6476	26.0881	19.736	19.223	23.128
	Vhalf1	82.7225	5.50555	6			Vhalf1	79.7866	77.2863	80.3982	91.458	89.183	78.223
	Vhalf2	27.0982	4.28872	6			Vhalf2	24.7095	31.3394	33.7255	23.709	21.528	27.578
	A1%	75.7223	6.98144	6			A1%	78.7166	67.3817	70.3954	81.3442	86.6495	69.8463
	A2%	24.2777	6.98144	6			A2%	21.2834	32.6183	29.6046	18.6558	13.3505	30.1537
L284F
FittingParameter			two Boltsman distributuions
		average	SD				Cell	1	2	3	4	5	6
	A1	-0.825714	0.0559165	6			A1	-0.892513	-0.864068	-0.757099	-0.780555	-0.77506	-0.88499
	A2	-0.189042	0.058086	6			A2	-0.126955	-0.152107	-0.255721	-0.232521	-0.24915	-0.1178
	slope1	13.6111	0.627206	6			slope1	13.8546	13.3502	12.6164	13.4584	13.673	14.714
	slope2	16.8134	2.69391	6	TTEST vs WT		slope2	13.8624	16.2875	18.5211	18.9824	20.278	12.949
	Vhalf1	75.1195	1.21284	6	0.0263124		Vhalf1	76.5827	73.6958	74.6398	74.5575	74.277	76.964
	Vhalf2	23.4363	6.6483	6	0.329073		Vhalf2	23.5474	16.534	32.9493	30.6852	21.972	14.93
	A1%	81.3841	5.68419	6			A1%	87.5469	85.0314	74.7516	77.048	75.6739	88.2528
	A2%	18.6159	5.68419	6			A2%	12.4531	14.9686	25.2484	22.952	24.3261	11.7472
L284Q
FittingParameter			single Boltsman distributuion
		average	SD				Cell	1	2	3	4	5	6
	A	-1.0592	0.00818092	6			A	-1.05054	-1.04848	-1.06067	-1.0704	-1.057	-1.0681
	slope	31.8513	1.86999	6			slope	29.2209	30.0031	32.781	34.519	31.225	33.359
	Vhalf	69.1753	4.09142	6			Vhalf	74.6059	68.6657	68.1754	74.376	65.335	63.894
F285Q
FittingParameter			single Boltsman distributuion
		average	SD				Cell	1	2	3	4	5	6
	A	-1.08156	0.0178272	6			A	-1.06221	-1.06484	-1.09397	-1.06995	-1.08614	-1.11227
	slope	34.2137	3.72286	6			slope	31.0796	31.6167	32.6712	32.1838	35.9656	41.765
	Vhalf	85.1083	4.44149	6			Vhalf	86.4911	87.9943	85.9424	75.5358	89.0465	85.6395
CiVSP K555Anap
WT
FittingParameter			two Boltsman distributuions
		average	SD				Cell	1	2	3	4	5	6	7
	A1	-0.847642	0.475508	7			A1	-0.322255	-0.778586	-1.30386	-1.38059	-0.533201	-0.212652	-1.40235
	A2	5.75799	2.80675	7			A2	2.67952	5.22551	9.06545	10.4662	4.94696	2.35448	5.56779
	slope1	14.3565	3.43822	7			slope1	12.1657	14.5891	13.1626	13.0447	11.6375	13.3892	22.5064
	slope2	21.3781	4.52842	7			slope2	19.8106	19.6809	20.8566	22.9699	31.4225	18.8133	16.0928
	Vhalf1	28.3066	10.1583	7			Vhalf1	30.8232	26.5222	31.9195	34.7999	15.2968	13.804	44.9807
	Vhalf2	115.041	11.3611	7			Vhalf2	96.701	106.87	108.881	121.923	134.936	117.016	118.962
L284F
FittingParameter			two Boltsman distributuions
		average	SD		TTEST vs WT		Cell	1	2	3	4	5	6	7
	A1	-1.23396	0.336496	7	0.130244		A1	-1.43868	-1.08816	-0.917658	-0.654651	-1.64168	-1.31508	-1.58178
	A2	8.90012	1.91599	7	0.042838		A2	11.9996	8.73295	8.30923	6.43815	11.1676	8.87684	6.77646
	slope1	14.9297	2.15049	7			slope1	14.3913	12.4853	16.2605	12.2578	13.6821	17.472	17.9591
	slope2	18.624	1.20025	7			slope2	18.7865	17.5001	18.7036	16.656	19.8332	20.4708	18.4178
	Vhalf1	33.0707	4.34675	7	0.311706		Vhalf1	31.4921	35.0275	25.4874	35.1413	33.8526	30.0477	40.446
	Vhalf2	101.637	3.91334	7	0.0181843		Vhalf2	96.3879	95.855	103.336	101.738	101.619	105.744	106.78
L284Q
FittingParameter			single Boltsman distributuions
		average	SD				Cell	1	2	3	4
	A	-1.76372		4			A	-0.919227	-0.612122	-2.20883	-3.31472
	slope	23.758		4			slope	22.6531	23.617	22.0759	26.6859
	Vhalf	57.216		4			Vhalf	68.048	55.5982	49.4213	55.7967
F285Q
FittingParameter			single Boltsman distributuions
		average	SD				Cell	1	2	3
	A	-0.841861	0.463513	3			A	-1.45037	-0.326529	-0.748685
	slope	29.5223	6.73958	3			slope	22.0838	28.0806	38.4024
	Vhalf	47.2557	14.84	3			Vhalf	57.7188	57.7794	26.2688
