# Supplementary material for: The hydrophobic nature of a novel membrane interface regulates the enzyme activity of a voltage-sensing phosphatase
Source: eLife journal article supplement (doi:10.7554/elife.41653), 2018-11-28
Supplement: supp [file elife_poa_e41653_Figure_5_source_data_1.xlsx]

## Sheet: Sheet1
Figure5-source data
Figure5
WT	Average	SD	n		Cell	1	2	3	4	5	6	7	8	9	10	11	12	13	14	15	16	17	18	19	20	21	22	23	24	25	26	27	28	29	30	31	32	33	34	35	36	37	38	39	40	41	42	43	44
Time constant (s)	0.440295	0.416647	56		Time constant	0.176211	0.231346	0.926538	0.434134	0.25844	0.224757	0.19226	0.0973779	0.0927475	0.0985533	0.065	0.065	0.121751	0.065	0.102171	0.619729	0.548138	0.242384	0.650426	0.785486	0.506845	0.636705	0.660122	1.63568	0.330421	0.256304	0.340425	0.138164	0.514308	0.196491	0.190262	0.198293	0.0920478	0.187117	0.169357	0.140706	0.640821	0.466991	0.380431	0.907423	0.228758	0.19302	0.616174	0.501874
Rate constant (s-1)	4.43482	3.75242	56		Rate constant	5.67501	4.32253	1.07929	2.30344	3.86937	4.44925	5.20129	10.2693	10.782	10.1468	15.3846	15.3846	8.21348	15.3846	9.78751	1.61361	1.82436	4.12568	1.53745	1.2731	1.97299	1.57059	1.51487	0.611367	3.02644	3.90162	2.9375	7.23778	1.94436	5.08929	5.25591	5.04304	10.8639	5.34425	5.90469	7.10702	1.5605	2.14137	2.6286	1.10202	4.37143	5.18081	1.62292	1.99253
Qoff (nC)	39.7804	23.8263	56		Qoff	50.4424	29.0013	64.7708	70.9665	47.5816	51.6011	32.4106	52.2999	60.6646	80.3845	75.4778	84.4194	64.5732	95.583	74.3939	14.2201	13.1959	10.1157	15.8024	12.9624	6.22639	6.99307	11.2614	9.14095	29.8981	23.5475	23.1375	53.6547	40.8185	36.1829	33.673	38.5243	73.0393	36.6253	56.6338	116.685	36.672	39.4723	49.4256	34.6426	48.9991	33.5139	26.3194	38.6047
L284G	Average	SD	n		Cell	1	2	3	4	5	6	7	8	9	10	11	12	13	14	15	16	17	18	19	20	21	22	23	24	25	26	27	28	29	30	31	32	33	34	35	36	37	38	39	40	41	42	43	44
Time constant (s)	6.00835	2.66831	3		Time constant	2.44786	8.8712	6.706
Rate constant (s-1)	0.223455	0.131702	3		Rate constant	0.40852	0.112724	0.14912
Qoff (nC)	42.4568	2.78155	3		Qoff	38.869	42.8537	45.6476
L284A	Average	SD	n		Cell	1	2	3	4	5	6	7	8	9	10	11	12	13	14	15	16	17	18	19	20	21	22	23	24	25	26	27	28	29	30	31	32	33	34	35	36	37	38	39	40	41	42	43	44
Time constant (s)	0.951586	0.384719	6		Time constant	0.47184	0.653569	0.970624	0.800443	1.14967	1.66337
Rate constant (s-1)	1.23333	0.490975	6		Rate constant	2.11936	1.53006	1.03027	1.24931	0.869815	0.601189
Qoff (nC)	23.8215	10.5414	6		Qoff	41.2915	22.5496	14.0598	34.5436	16.347	14.1373
L284V	Average	SD	n		Cell	1	2	3	4	5	6	7	8	9	10	11	12	13	14	15	16	17	18	19	20	21	22	23	24	25	26	27	28	29	30	31	32	33	34	35	36	37	38	39	40	41	42	43	44
Time constant (s)	0.44528	0.199109	5		Time constant	0.739485	0.238432	0.238255	0.408007	0.602222
Rate constant (s-1)	2.771	1.21717	5		Rate constant	1.35229	4.19407	4.19718	2.45094	1.66052
Qoff (nC)	45.5205	20.3175	5		Qoff	30.0588	83.4045	32.5996	31.3449	50.1947
L284T	Average	SD	n		Cell	1	2	3	4	5	6	7	8	9	10	11	12	13	14	15	16	17	18	19	20	21	22	23	24	25	26	27	28	29	30	31	32	33	34	35	36	37	38	39	40	41	42	43	44
Time constant (s)	0.699357	0.0757501	4		Time constant	0.625529	0.79597	0.750845	0.625083
Rate constant (s-1)	1.44665	0.154887	4		Rate constant	1.59865	1.25633	1.33183	1.59979
Qoff (nC)	60.6379	10.052	4		Qoff	71.5757	64.1031	62.6236	44.2494
L284H	Average	SD	n		Cell	1	2	3	4	5	6	7	8	9	10	11	12	13	14	15	16	17	18	19	20	21	22	23	24	25	26	27	28	29	30	31	32	33	34	35	36	37	38	39	40	41	42	43	44
Time constant (s)	4.35372	0.123119	3		Time constant	4.33588	4.21265	4.51264
Rate constant (s-1)	0.229871	0.00646488	3		Rate constant	0.230634	0.23738	0.2216
Qoff (nC)	35.833	0.951225	3		Qoff	35.335	34.9997	37.1642
L284F	Average	SD	n		Cell	1	2	3	4	5	6	7	8	9	10	11	12	13	14	15	16	17	18	19	20	21	22	23	24	25	26	27	28	29	30	31	32	33	34	35	36	37	38	39	40	41	42	43	44
Time constant (s)	0.184097	0.116807	35		Time constant	0.065	0.065	0.110513	0.104028	0.0763094	0.0823014	0.065	0.0948462	0.065	0.0881784	0.100582	0.22717	0.141718	0.155842	0.416926	0.133734	0.228338	0.348302	0.157317	0.11774	0.203338	0.413334	0.567609	0.134522	0.065	0.193609	0.176761	0.134004	0.1629	0.33988	0.212452	0.271127	0.278183	0.263906	0.182931
Rate constant (s-1)	7.64747	4.21825	35		Rate constant	15.3846	15.3846	9.04871	9.6128	13.1045	12.1505	15.3846	10.5434	15.3846	11.3406	9.94214	4.40199	7.05627	6.41676	2.39851	7.47753	4.37947	2.87107	6.35659	8.49329	4.91792	2.41935	1.76178	7.43373	15.3846	5.16505	5.65736	7.46246	6.13874	2.94221	4.70695	3.68831	3.59476	3.78923	5.46654
Qoff (nC)	33.3473	14.3061	35		Qoff	52.4993	44.8957	39.9485	43.8762	61.6846	42.5959	70.6487	42.3084	25.9253	41.0706	7.17969	21.1245	23.0796	24.0073	23.8124	29.6403	18.406	16.2709	19.8761	23.7981	25.7933	12.6796	20.4486	39.3077	55.0397	47.0822	45.237	31.1724	34.7614	37.5282	36.3361	42.7738	17.6619	31.3353	17.3485
t-test vs WT	p	0.000320511
L284Y	Average	SD	n		Cell	1	2	3	4	5	6	7	8	9	10	11	12	13	14	15	16	17	18	19	20	21	22	23	24	25	26	27	28	29	30	31	32	33	34	35	36	37	38	39	40	41	42	43	44
Time constant (s)	0.0995534	0.065657	13		Time constant	0.065	0.065	0.0766189	0.065	0.0673649	0.065	0.065	0.124925	0.0617897	0.259986	0.237262	0.0762479	0.065
Rate constant (s-1)	12.7361	4.23075	13		Rate constant	15.3846	15.3846	13.0516	15.3846	14.8445	15.3846	15.3846	8.0048	16.1839	3.84636	4.21475	13.1151	15.3846
Qoff (nC)	62.9634	35.2133	13		Qoff	61.3278	59.1508	67.9799	110.582	94.819	61.0628	109.763	9.91934	120.42	26.2156	17.6201	42.0335	37.6306
t-test vs WT	p	2.22502e-09
L284W	Average	SD	n		Cell	1	2	3	4	5	6	7	8	9	10	11	12	13	14	15	16	17	18	19	20	21	22	23	24	25	26	27	28	29	30	31	32	33	34	35	36	37	38	39	40	41	42	43	44
Time constant (s)	0.0994593	0.0598839	15		Time constant	0.11729	0.111496	0.103409	0.065	0.065	0.0853686	0.065	0.065	0.065	0.065	0.065	0.065	0.233284	0.065	0.256042
Rate constant (s-1)	12.3689	4.10562	15		Rate constant	8.52588	8.96893	9.67034	15.3846	15.3846	11.7139	15.3846	15.3846	15.3846	15.3846	15.3846	15.3846	4.28662	15.3846	3.90561
Qoff (nC)	50.4723	20.5582	15		Qoff	34.6742	30.1162	52.9665	89.7092	81.967	50.8603	60.1556	57.6871	45.5336	51.076	79.232	44.8686	19.4186	40.7473	18.0718
t-test vs WT	p	1.19982e-09
L284Q	Average	SD	n		Cell	1	2	3	4	5	6	7	8	9	10	11	12	13	14	15	16	17	18	19	20	21	22	23	24	25	26	27	28	29	30	31	32	33	34	35	36	37	38	39	40	41	42	43	44
Time constant (s)	2.31475	0.641384	4		Time constant	3.188	1.49276	1.96823	2.61002
Rate constant (s-1)	0.468696	0.135448	4		Rate constant	0.313676	0.6699	0.508071	0.383139
Qoff (nC)	76.975	27.9743	4		Qoff	35.5017	104.33	100.801	67.2673
L284D	Average	SD	n		Cell	1	2	3	4	5	6	7	8	9	10	11	12	13	14	15	16	17	18	19	20	21	22	23	24	25	26	27	28	29	30	31	32	33	34	35	36	37	38	39	40	41	42	43	44
Time constant (s)	36.8718	34.314	10		Time constant	17.63	19.2637	18.5061	18.1685	25.6188	47.5121	52.7092	132.748	14.2237	22.3377
Rate constant (s-1)	0.0419368	0.0189862	10		Rate constant	0.0567215	0.0519111	0.0540362	0.0550403	0.0390338	0.0210473	0.018972	0.00753307	0.0703052	0.0447674
Qoff (nC)	14.9267	9.86274	10		Qoff	28.9196	37.6199	16.5998	9.79742	14.3132	5.46711	7.67563	8.86223	11.6195	8.39282
L284K	Average	SD	n		Cell	1	2	3	4	5	6	7	8	9	10	11	12	13	14	15	16	17	18	19	20	21	22	23	24	25	26	27	28	29	30	31	32	33	34	35	36	37	38	39	40	41	42	43	44
Time constant (s)	26.8468	6.58882	5		Time constant	21.2386	33.9659	31.3128	16.8898	30.827
Rate constant (s-1)	0.0400215	0.0114262	5		Rate constant	0.0470841	0.0294413	0.0319358	0.0592073	0.0324391
Qoff (nC)	40.9866	19.2199	5		Qoff	53.9176	17.8177	17.2793	59.5156	56.4028
F285G	Average	SD	n		Cell	1	2	3	4	5	6	7	8	9	10	11	12	13	14	15	16	17	18	19	20	21	22	23	24	25	26	27	28	29	30	31	32	33	34	35	36	37	38	39	40	41	42	43	44
Time constant (s)	3.7243	2.51575	3		Time constant	1.7143	2.18697	7.27162
Rate constant (s-1)	0.392701	0.187637	3		Rate constant	0.583328	0.457254	0.137521
Qoff (nC)	32.169	11.9555	3		Qoff	48.926	25.7401	21.8408
F285A	Average	SD	n		Cell	1	2	3	4	5	6	7	8	9	10	11	12	13	14	15	16	17	18	19	20	21	22	23	24	25	26	27	28	29	30	31	32	33	34	35	36	37	38	39	40	41	42	43	44
Time constant (s)	2.73332	1.67463	4		Time constant	1.36962	1.04808	5.22471	3.29086
Rate constant (s-1)	0.544881	0.310175	4		Rate constant	0.73013	0.954126	0.191398	0.303872
Qoff (nC)	33.858	4.99818	4		Qoff	40.5119	36.8261	29.5712	28.5226
F285L	Average	SD	n		Cell	1	2	3	4	5	6	7	8	9	10	11	12	13	14	15	16	17	18	19	20	21	22	23	24	25	26	27	28	29	30	31	32	33	34	35	36	37	38	39	40	41	42	43	44
Time constant (s)	0.276167	0.159804	3		Time constant	0.237292	0.488407	0.102803
Rate constant (s-1)	5.32968	3.23299	3		Rate constant	4.21422	2.04747	9.72734
Qoff (nC)	45.3896	11.5281	3		Qoff	50.4972	56.2441	29.4276
F285T	Average	SD	n		Cell	1	2	3	4	5	6	7	8	9	10	11	12	13	14	15	16	17	18	19	20	21	22	23	24	25	26	27	28	29	30	31	32	33	34	35	36	37	38	39	40	41	42	43	44
Time constant (s)	3.47352	1.41028	3		Time constant	5.46328	2.59693	2.36036
Rate constant (s-1)	0.330591	0.105517	3		Rate constant	0.18304	0.38507	0.423664
Qoff (nC)	38.4552	12.9313	3		Qoff	56.4436	26.6081	32.3139
F285H	Average	SD	n		Cell	1	2	3	4	5	6	7	8	9	10	11	12	13	14	15	16	17	18	19	20	21	22	23	24	25	26	27	28	29	30	31	32	33	34	35	36	37	38	39	40	41	42	43	44
Time constant (s)	2.20127	0.635404	3		Time constant	3.08595	1.89536	1.6225
Rate constant (s-1)	0.489329	0.122355	3		Rate constant	0.324049	0.527604	0.616333
Qoff (nC)	65.4267	2.23367	3		Qoff	62.9939	64.8981	68.3881
F285Y	Average	SD	n		Cell	1	2	3	4	5	6	7	8	9	10	11	12	13	14	15	16	17	18	19	20	21	22	23	24	25	26	27	28	29	30	31	32	33	34	35	36	37	38	39	40	41	42	43	44
Time constant (s)	0.121875	0.0378998	4		Time constant	0.065	0.165474	0.112361	0.144666
Rate constant (s-1)	9.31006	3.65681	4		Rate constant	15.3846	6.04325	8.89989	6.91247
Qoff (nC)	55.3167	6.79784	4		Qoff	51.6106	50.7105	51.8786	67.067
F285W	Average	SD	n		Cell	1	2	3	4	5	6	7	8	9	10	11	12	13	14	15	16	17	18	19	20	21	22	23	24	25	26	27	28	29	30	31	32	33	34	35	36	37	38	39	40	41	42	43	44
Time constant (s)	0.15943	0.0850016	3		Time constant	0.1343	0.2738	0.0701898
Rate constant (s-1)	8.44847	4.383	3		Rate constant	7.44602	3.6523	14.2471
Qoff (nC)	70.4411	2.25743	3		Qoff	72.7093	67.3614	71.2527
F285Q	Average	SD	n		Cell	1	2	3	4	5	6	7	8	9	10	11	12	13	14	15	16	17	18	19	20	21	22	23	24	25	26	27	28	29	30	31	32	33	34	35	36	37	38	39	40	41	42	43	44
Time constant (s)	27.8272	10.7278	4		Time constant	25.0766	15.8764	25.131	45.225
Rate constant (s-1)	0.0411919	0.0145151	4		Rate constant	0.0398778	0.0629866	0.0397915	0.0221117
Qoff (nC)	73.8637	29.0345	4		Qoff	81.0359	108.483	77.9561	27.9798
F285D	Average	SD	n		Cell	1	2	3	4	5	6	7	8	9	10	11	12	13	14	15	16	17	18	19	20	21	22	23	24	25	26	27	28	29	30	31	32	33	34	35	36	37	38	39	40	41	42	43	44
Time constant (s)	10000	0	7		Time constant	10000	10000	10000	10000	10000	10000	10000
Rate constant (s-1)	0.0001	1.35525e-20	7		Rate constant	0.0001	0.0001	0.0001	0.0001	0.0001	0.0001	0.0001
Qoff (nC)	26.9557	7.84342	7		Qoff	27.0884	24.7985	37.8532	34.6844	19.1138	31.167	13.9848
F285K	Average	SD	n		Cell	1	2	3	4	5	6	7	8	9	10	11	12	13	14	15	16	17	18	19	20	21	22	23	24	25	26	27	28	29	30	31	32	33	34	35	36	37	38	39	40	41	42	43	44
Time constant (s)	10000	0	3		Time constant	10000	10000	10000
Rate constant (s-1)	0.0001	0	3		Rate constant	0.0001	0.0001	0.0001
Qoff (nC)	32.5005	5.87087	3		Qoff	40.3061	26.1472	31.0481
[truncated: 12 more columns]
