# Supplementary material for: The hydrophobic nature of a novel membrane interface regulates the enzyme activity of a voltage-sensing phosphatase
Source: eLife journal article supplement (doi:10.7554/elife.41653), 2018-11-28
Supplement: supp [file elife_poa_e41653_Figure_8_source_data_1.xlsx]

## Sheet: Sheet1
Figure8-souce data
Figure8B
Ci-VSP G214C-TMRM
WT							Cell
	Normalized dF/F	average	SD	n		Voltage	1	2	3
	-60	0	0	3		-60	0	0	0
	-50	0.00532954	0.00289215	3		-50	0.0023755	0.00925646	0.00435667
	-40	0.00187205	0.00102625	3		-40	0.000422431	0.00265805	0.00253567
	-30	-0.014945	0.0111023	3		-30	-0.0047232	-0.00973458	-0.0303772
	-20	-0.0202169	0.0080237	3		-20	-0.0107994	-0.0194435	-0.0304077
	-10	-0.0369489	0.00566994	3		-10	-0.0291987	-0.0390427	-0.0426054
	0	-0.0559049	0.00878655	3		0	-0.0437637	-0.0596843	-0.0642666
	10	-0.0745797	0.00490887	3		10	-0.0684516	-0.0804687	-0.0748188
	20	-0.112359	0.00714076	3		20	-0.102268	-0.117747	-0.11706
	30	-0.157942	0.0114273	3		30	-0.150335	-0.174094	-0.149399
	40	-0.21255	0.0192567	3		40	-0.19664	-0.239646	-0.201363
	50	-0.279327	0.0182065	3		50	-0.261145	-0.304207	-0.272629
	60	-0.376413	0.0271877	3		60	-0.356487	-0.414854	-0.357898
	70	-0.493848	0.0318163	3		70	-0.467065	-0.538551	-0.475928
	80	-0.630907	0.0280345	3		80	-0.60556	-0.669982	-0.61718
	90	-0.769064	0.0255671	3		90	-0.736349	-0.798756	-0.772087
	100	-0.865911	0.019294	3		100	-0.839256	-0.88429	-0.874188
	110	-0.934836	0.0157581	3		110	-0.912571	-0.945154	-0.946784
	120	-0.979595	0.0153994	3		120	-0.95863	-0.984973	-0.995183
	130	-1.0028	0.0135723	3		130	-0.984917	-1.00569	-1.01778
	140	-1.01821	0.0123015	3		140	-1.00319	-1.01813	-1.03332
	150	-1.02116	0.0140156	3		150	-1.00965	-1.01294	-1.04089
	160	-1.02117	0.0145769	3		160	-1.01177	-1.00998	-1.04176
	170	-1.02199	0.0141757	3		170	-1.01216	-1.01177	-1.04204
	180	-1.01649	0.0156436	3		180	-1.0102	-1.00126	-1.038
	190	-1.01349	0.014019	3		190	-1.00424	-1.00293	-1.0333
	200	-1	0	3		200	-1	-1	-1
L284F							Cell
	Normalized dF/F	average	SD	n		Voltage	1	2	3	4
	-60	0	0	4		-60	0	0	0	0
	-50	0.00460377	0.00158751	4		-50	0.00586843	0.00619037	0.00220365	0.00415266
	-40	0.00591077	0.00182747	4		-40	0.0079104	0.00699909	0.00306143	0.00567216
	-30	0.000555328	0.00164157	4		-30	0.00257124	0.000488498	-0.00197021	0.00113179
	-20	-0.00372273	0.00985176	4		-20	0.0132889	-0.00847111	-0.00911503	-0.0105936
	-10	-0.0157924	0.0131919	4		-10	0.00645134	-0.0218305	-0.0197993	-0.0279912
	0	-0.0316926	0.00728692	4		0	-0.0194827	-0.0387629	-0.0345067	-0.0340181
	10	-0.054358	0.00755645	4		10	-0.0422055	-0.0597324	-0.0615457	-0.0539482
	20	-0.0830718	0.0125219	4		20	-0.061538	-0.0894654	-0.0886418	-0.092642
	30	-0.124112	0.0181248	4		30	-0.0929364	-0.132827	-0.132702	-0.137981
	40	-0.178123	0.0161976	4		40	-0.151167	-0.179779	-0.190886	-0.190659
	50	-0.252737	0.0239643	4		50	-0.213527	-0.252972	-0.272508	-0.27194
	60	-0.362241	0.0261266	4		60	-0.319613	-0.362149	-0.3842	-0.383003
	70	-0.508489	0.0288213	4		70	-0.460655	-0.511567	-0.534307	-0.527425
	80	-0.6642	0.0301344	4		80	-0.612269	-0.677872	-0.686218	-0.680442
	90	-0.799931	0.0206561	4		90	-0.766225	-0.807999	-0.822154	-0.803345
	100	-0.893214	0.016287	4		100	-0.866389	-0.901108	-0.909749	-0.895613
	110	-0.951058	0.0084012	4		110	-0.938462	-0.952106	-0.962118	-0.951546
	120	-0.984878	0.00657915	4		120	-0.978268	-0.984401	-0.995636	-0.981207
	130	-1.00058	0.00150636	4		130	-0.99799	-1.00167	-1.00148	-1.00119
	140	-1.00637	0.00190411	4		140	-1.00644	-1.00502	-1.00459	-1.00945
	150	-1.01306	0.00319482	4		150	-1.01067	-1.01856	-1.01141	-1.0116
	160	-1.0082	0.00211009	4		160	-1.01098	-1.0093	-1.00542	-1.00711
	170	-1.00346	0.00275032	4		170	-1.00793	-1.00047	-1.00235	-1.0031
	180	-1.00346	0.00653612	4		180	-1.01123	-1.00845	-0.995633	-0.998515
	190	-1.00122	0.00549473	4		190	-1.00584	-1.00733	-0.994354	-0.997359
	200	-1	0	4		200	-1	-1	-1	-1
L284Q							Cell
	Normalized dF/F	average	SD	n		Voltage	1	2	3
	-60	0	0	3		-60	0	0	0
	-50	0.00755751	0.00265524	3		-50	0.0112317	0.00504896	0.00639192
	-40	0.00585218	0.00344345	3		-40	0.0107216	0.00346731	0.00336762
	-30	-0.00155577	0.00411212	3		-30	0.00424164	-0.00485038	-0.00405858
	-20	-0.0152686	0.00567814	3		-20	-0.00735256	-0.0180586	-0.0203946
	-10	-0.0318125	0.00683405	3		-10	-0.0221539	-0.0363415	-0.0369421
	0	-0.0602387	0.00876179	3		0	-0.0482645	-0.063466	-0.0689857
	10	-0.0955044	0.0130514	3		10	-0.0771059	-0.103427	-0.10598
	20	-0.14216	0.0168457	3		20	-0.118588	-0.150957	-0.156935
	30	-0.196569	0.0206502	3		30	-0.168038	-0.205438	-0.216232
	40	-0.260269	0.0220613	3		40	-0.229621	-0.270539	-0.280648
	50	-0.33153	0.0249609	3		50	-0.29663	-0.344395	-0.353567
	60	-0.408717	0.0248678	3		60	-0.373931	-0.421625	-0.430593
	70	-0.487101	0.0245457	3		70	-0.452506	-0.501927	-0.506871
	80	-0.56933	0.0225628	3		80	-0.537575	-0.587912	-0.582504
	90	-0.650786	0.0192924	3		90	-0.624885	-0.671162	-0.656311
	100	-0.727422	0.0145605	3		100	-0.710814	-0.746268	-0.725183
	110	-0.794737	0.0122327	3		110	-0.786427	-0.812032	-0.785752
	120	-0.849974	0.0110365	3		120	-0.847982	-0.864377	-0.837564
	130	-0.89282	0.0110673	3		130	-0.894206	-0.905628	-0.878625
	140	-0.925634	0.0104241	3		140	-0.929965	-0.935672	-0.911265
	150	-0.950901	0.00913642	3		150	-0.955147	-0.959346	-0.938209
	160	-0.970773	0.00642123	3		160	-0.973926	-0.976572	-0.961822
	170	-0.985098	0.00524986	3		170	-0.989105	-0.988508	-0.977682
	180	-0.993449	0.00335109	3		180	-0.996012	-0.995621	-0.988715
	190	-0.998702	0.000857148	3		190	-0.999044	-0.999538	-0.997524
	200	-1	0	3		200	-1	-1	-1
F285Q							Cell
	Normalized dF/F	average	SD	n		Voltage	1	2	3	4	5	6
	-60	0	0	6		-60	0	0	0	0	0	0
	-50	0.0120822	0.00432329	6		-50	0.00546012	0.0119957	0.020257	0.0113749	0.0122817	0.0111238
	-40	0.0154856	0.00721643	6		-40	0.011417	0.0158513	0.0289533	0.00773908	0.00936031	0.0195925
	-30	0.0133515	0.0105039	6		-30	0.0162806	0.0151503	0.03344	0.00184689	0.0102779	0.00311329
	-20	0.00406646	0.00996913	6		-20	0.0104313	0.00603522	0.020702	-0.00111138	-0.000705069	-0.0109533
	-10	-0.00968349	0.0136465	6		-10	-0.00148823	0.00197854	0.00880149	-0.0263391	-0.0150527	-0.0260009
	0	-0.0316922	0.00991609	6		0	-0.0228672	-0.0266212	-0.0220209	-0.0506526	-0.0306238	-0.0373671
	10	-0.0524252	0.0158697	6		10	-0.0384321	-0.0368817	-0.036709	-0.0751332	-0.0583652	-0.0690303
	20	-0.091717	0.019018	6		20	-0.0757826	-0.0691819	-0.0870439	-0.122244	-0.0843309	-0.111719
	30	-0.13883	0.0192596	6		30	-0.115408	-0.119421	-0.132732	-0.170327	-0.139829	-0.155263
	40	-0.186193	0.0250982	6		40	-0.171024	-0.158264	-0.177363	-0.230727	-0.171441	-0.208341
	50	-0.244692	0.0298	6		50	-0.218503	-0.221763	-0.228521	-0.303448	-0.234148	-0.26177
	60	-0.31518	0.0319821	6		60	-0.291911	-0.282962	-0.303232	-0.374273	-0.298278	-0.340425
	70	-0.38625	0.0358944	6		70	-0.361117	-0.35472	-0.363119	-0.454549	-0.371519	-0.412477
	80	-0.468366	0.0349871	6		80	-0.452713	-0.432477	-0.464311	-0.540454	-0.444914	-0.475327
	90	-0.539189	0.0366376	6		90	-0.53483	-0.516943	-0.518894	-0.619168	-0.513049	-0.532248
	100	-0.611468	0.0372677	6		100	-0.603719	-0.591302	-0.612354	-0.691752	-0.585865	-0.583815
	110	-0.679356	0.0369395	6		110	-0.683915	-0.675293	-0.683219	-0.751141	-0.647725	-0.634843
	120	-0.746366	0.0368458	6		120	-0.760242	-0.746668	-0.757084	-0.808101	-0.714769	-0.691333
	130	-0.804056	0.0351287	6		130	-0.813394	-0.806063	-0.824251	-0.858683	-0.771187	-0.750758
	140	-0.853456	0.0349426	6		140	-0.866503	-0.858784	-0.874261	-0.901153	-0.827987	-0.792049
	150	-0.896051	0.0316195	6		150	-0.909965	-0.904139	-0.917321	-0.935439	-0.867359	-0.842082
	160	-0.928801	0.0279496	6		160	-0.939131	-0.929186	-0.946867	-0.965935	-0.914588	-0.877101
	170	-0.958886	0.0263316	6		170	-0.964429	-0.951948	-0.99013	-0.987153	-0.947397	-0.91226
	180	-0.97781	0.0194236	6		180	-0.990889	-0.987238	-0.985814	-0.997907	-0.9638	-0.941211
	190	-0.989968	0.013723	6		190	-0.989979	-0.989265	-1.00122	-1.00894	-0.985362	-0.965038
	200	-1	0	6		200	-1	-1	-1	-1	-1	-1
