# Supplementary material for: The hydrophobic nature of a novel membrane interface regulates the enzyme activity of a voltage-sensing phosphatase
Source: eLife journal article supplement (doi:10.7554/elife.41653), 2018-11-28
Supplement: supp [file elife_poa_e41653_Figure_9_source_data_1.xlsx]

## Sheet: Sheet1
Figure9 -source data
Figure9B,C
CiVSP K555Anap
WT							Cell
	Normalized dF/F	average	SD	n		Voltage	1	2	3	4
	-60	0.0247561	0.0065383	4		-60	0.0175319	0.0330871	0.0291418	0.0192635
	-40	-0.00420018	0.0212997	4		-50	-0.00524961	0.0133212	-0.0386177	0.0137454
	-20	-0.0450473	0.0134639	4		-40	-0.0316963	-0.0517592	-0.0328786	-0.0638551
	0	-0.0734641	0.0422702	4		-30	-0.0261588	-0.140911	-0.0545233	-0.0722633
	20	-0.193134	0.103834	4		-20	-0.0234425	-0.197891	-0.294397	-0.256804
	40	-0.338044	0.154303	4		-10	-0.0745349	-0.383875	-0.44493	-0.448838
	60	-0.313321	0.241126	4		0	0.060811	-0.291601	-0.428267	-0.594227
	80	0.253994	0.202451	4		10	0.45061	0.214549	0.411397	-0.0605802
	100	1.64324	0.435517	4		20	1.16747	1.48221	2.35129	1.57199
	120	3.14564	1.05015	4		30	1.72789	2.62572	4.47062	3.75833
	140	4.40236	1.63783	4		40	2.07121	3.66486	6.08426	5.7891
	160	5.17593	2.10814	4		50	2.23914	4.122	6.97315	7.36944
	180	5.66268	2.44088	4		60	2.34881	4.33818	7.57056	8.39315
	Qoff (nC)	67.6095	8.63732	4		Qoff	58.8593	59.086	76.3116	76.181
L284F							Cell
	Normalized dF/F	average	SD	n		Voltage	1	2	3	4
	-60	0.0024446	0.015719	4		-60	0.00743866	0.00658273	-0.0233886	0.0191456
	-40	0.00189981	0.0181022	4		-50	-0.0242283	-0.00297171	0.00952984	0.0252694
	-20	-0.00495382	0.0263007	4		-40	-0.0369845	0.0288053	-0.0231354	0.0114993
	0	-0.0991188	0.0492338	4		-30	-0.131095	-0.0821033	-0.15595	-0.027327
	20	-0.217637	0.0674071	4		-20	-0.262135	-0.171094	-0.302404	-0.134914
	40	-0.250395	0.0461783	4		-10	-0.256178	-0.235199	-0.319214	-0.190987
	60	-0.0200082	0.106335	4		0	0.151272	-0.0172908	-0.087688	-0.126326
	80	1.1926	0.519315	4		10	1.99021	1.30973	0.807631	0.662835
	100	3.66561	1.0788	4		20	5.29065	3.93963	2.97702	2.45515
	120	5.74659	1.38027	4		30	7.89988	5.88229	5.0179	4.18629
	140	6.95207	1.57025	4		40	9.43659	6.9336	6.28863	5.14946
	160	7.53935	1.65586	4		50	10.1735	7.37833	6.99004	5.61552
	180	7.83418	1.71366	4		60	10.5171	7.71108	7.34707	5.76149
	Qoff	35.0253	4.68833	4		Qoff	42.7602	30.9568	31.6398	34.7445
L284Q							Cell
	Normalized dF/F	average	SD	n		Voltage	1	2	3
	-60	-0.0136457	0.0288047	3		-60	-0.0360275	-0.0319312	0.0270215
	-40	0.000472133	0.0224957	3		-50	-0.0107336	-0.0197108	0.0318608
	-20	0.0243457	0.0318445	3		-40	-0.0199971	0.0397057	0.0533284
	0	-0.0330749	0.0699536	3		-30	-0.130647	0.00156804	0.0298543
	20	-0.0687876	0.0158873	3		-20	-0.0911091	-0.0554081	-0.0598457
	40	-0.19559	0.125359	3		-10	-0.273531	-0.294519	-0.0187196
	60	-0.192947	0.170268	3		0	-0.328005	-0.298063	0.0472269
	80	-0.364623	0.239094	3		10	-0.659346	-0.360796	-0.0737263
	100	-0.447485	0.323995	3		20	-0.783483	-0.549279	-0.00969398
	120	-0.472346	0.350428	3		30	-0.816938	-0.6085	0.00840081
	140	-0.505418	0.352975	3		40	-0.906128	-0.562862	-0.0472629
	160	-0.513551	0.35303	3		50	-0.885741	-0.615642	-0.0392709
	180	-0.518682	0.4011	3		60	-0.99396	-0.549195	-0.0128919
	Qoff	16.1124	2.18657	3		Qoff	17.0713	18.1789	13.087
F285Q							Cell
	Normalized dF/F	average	SD	n		Voltage	1	2	3
	-60	0.032305	0.0399731	3		-60	0.0865181	0.0190721	-0.00867519
	-40	0.00553009	0.0421349	3		-50	0.0586616	0.00232678	-0.0443981
	-20	-0.0525957	0.0304347	3		-40	-0.0584209	-0.0127513	-0.086615
	0	-0.0815601	0.0627751	3		-30	-0.110927	0.00567857	-0.139432
	20	-0.202635	0.0962685	3		-20	-0.230282	-0.0733636	-0.304259
	40	-0.280307	0.125209	3		-10	-0.358952	-0.10359	-0.37838
	60	-0.429786	0.223032	3		0	-0.690189	-0.14545	-0.453718
	80	-0.59998	0.365391	3		10	-1.07164	-0.181343	-0.546957
	100	-0.685772	0.418834	3		20	-1.25589	-0.261584	-0.539843
	120	-0.733631	0.406321	3		30	-1.28874	-0.327485	-0.584668
	140	-0.781117	0.478805	3		40	-1.4128	-0.254056	-0.676496
	160	-0.789249	0.471591	3		50	-1.42959	-0.307616	-0.63054
	180	-0.77948	0.434966	3		60	-1.35285	-0.299848	-0.685741
	Qoff	15.9303	4.38281	3		Qoff	18.6066	19.4339	9.75052
