# Supplementary material for: The hydrophobic nature of a novel membrane interface regulates the enzyme activity of a voltage-sensing phosphatase
Source: eLife journal article supplement (doi:10.7554/elife.41653), 2018-11-28
Supplement: supp [file elife_poa_e41653_Figure_10_source_data_1.xlsx]

## Sheet: Sheet1
Figure10-souce data
Figure 10
Ci-VSP G214C-TMRM
WT
FittingParameter			two Boltsman distributuions
		average	SD			Cell	1	2	3
	A1	-0.743	0.0459607	3		A1	-0.800036	-0.687487	-0.741478
	A2	-0.28698	0.0506967	3		A2	-0.216314	-0.3328	-0.311826
	slope1	14.1723	0.615159	3		slope1	15.0412	13.7011	13.7745
	slope2	21.7141	3.22539	3		slope2	18.4065	20.6476	26.0881
	Vhalf1	79.157	1.34617	3		Vhalf1	79.7866	77.2863	80.3982
	Vhalf2	29.9248	3.81426	3		Vhalf2	24.7095	31.3394	33.7255
	A1%	72.1646	4.79355	3		A1%	78.7166	67.3817	70.3954
	A2%	27.8354	4.79355	3		A2%	21.2834	32.6183	29.6046
L284F
FittingParameter			two Boltsman distributuions
		average	SD			Cell	1	2	3	4
	A1	-0.823559	0.0562626	4		A1	-0.892513	-0.864068	-0.757099	-0.780555
	A2	-0.191826	0.0536761	4		A2	-0.126955	-0.152107	-0.255721	-0.232521
	slope1	13.3199	0.44747	4		slope1	13.8546	13.3502	12.6164	13.4584
	slope2	16.9134	2.03506	4		slope2	13.8624	16.2875	18.5211	18.9824
	Vhalf1	74.8689	1.05626	4		Vhalf1	76.5827	73.6958	74.6398	74.5575
	Vhalf2	25.929	6.43902	4		Vhalf2	23.5474	16.534	32.9493	30.6852
	A1%	81.0945	5.33244	4		A1%	87.5469	85.0314	74.7516	77.048
	A2%	18.9055	5.33244	4		A2%	12.4531	14.9686	25.2484	22.952
L284Q
FittingParameter			single Boltsman distributuion
		average	SD			Cell	1	2	3
	A	-1.05323	0.00532767	3		A	-1.05054	-1.04848	-1.06067
	slope	30.6683	1.52763	3		slope	29.2209	30.0031	32.781
	Vhalf	70.4823	2.92266	3		Vhalf	74.6059	68.6657	68.1754
F285Q
FittingParameter			single Boltsman distributuion
		average	SD			Cell	1	2	3	4	5	6
	A	-1.08156	0.0178272	6		A	-1.06221	-1.06484	-1.09397	-1.06995	-1.08614	-1.11227
	slope	34.2137	3.72286	6		slope	31.0796	31.6167	32.6712	32.1838	35.9656	41.765
	Vhalf	85.1083	4.44149	6		Vhalf	86.4911	87.9943	85.9424	75.5358	89.0465	85.6395
CiVSP K555Anap
WT
FittingParameter			two Boltsman distributuions
		average	SD			Cell	1	2	3	4
	A1	-0.946323	0.428374	4		A1	-0.322255	-0.778586	-1.30386	-1.38059
	A2	6.85917	3.08288	4		A2	2.67952	5.22551	9.06545	10.4662
	slope1	13.2405	0.868666	4		slope1	12.1657	14.5891	13.1626	13.0447
	slope2	20.8295	1.31715	4		slope2	19.8106	19.6809	20.8566	22.9699
	Vhalf1	31.0162	2.97345	4		Vhalf1	30.8232	26.5222	31.9195	34.7999
	Vhalf2	108.594	8.97441	4		Vhalf2	96.701	106.87	108.881	121.923
L284F
FittingParameter			two Boltsman distributuions
		average	SD			Cell	1	2	3	4
	A1	-1.02479	0.284518	4		A1	-1.43868	-1.08816	-0.917658	-0.654651
	A2	8.86998	2.00259	4		A2	11.9996	8.73295	8.30923	6.43815
	slope1	13.8487	1.62026	4		slope1	14.3913	12.4853	16.2605	12.2578
	slope2	17.9115	0.885802	4		slope2	18.7865	17.5001	18.7036	16.656
	Vhalf1	31.7871	3.92186	4		Vhalf1	31.4921	35.0275	25.4874	35.1413
	Vhalf2	99.3292	3.26259	4		Vhalf2	96.3879	95.855	103.336	101.738
L284Q
FittingParameter			single Boltsman distributuions
		average	SD			Cell	1	2
	A	-0.765675		2		A	-0.919227	-0.612122
	slope	23.135		2		slope	22.6531	23.617
	Vhalf	61.8231		2		Vhalf	68.048	55.5982
F285Q
FittingParameter			single Boltsman distributuions
		average	SD			Cell	1	2	3
	A	-0.841861	0.463513	3		A	-1.45037	-0.326529	-0.748685
	slope	29.5223	6.73958	3		slope	22.0838	28.0806	38.4024
	Vhalf	47.2557	14.84	3		Vhalf	57.7188	57.7794	26.2688
