# Supplementary figures and images for: The hydrophobic nature of a novel membrane interface regulates the enzyme activity of a voltage-sensing phosphatase
Source: eLife journal article supplement (doi:10.7554/elife.41653), 2018-11-28

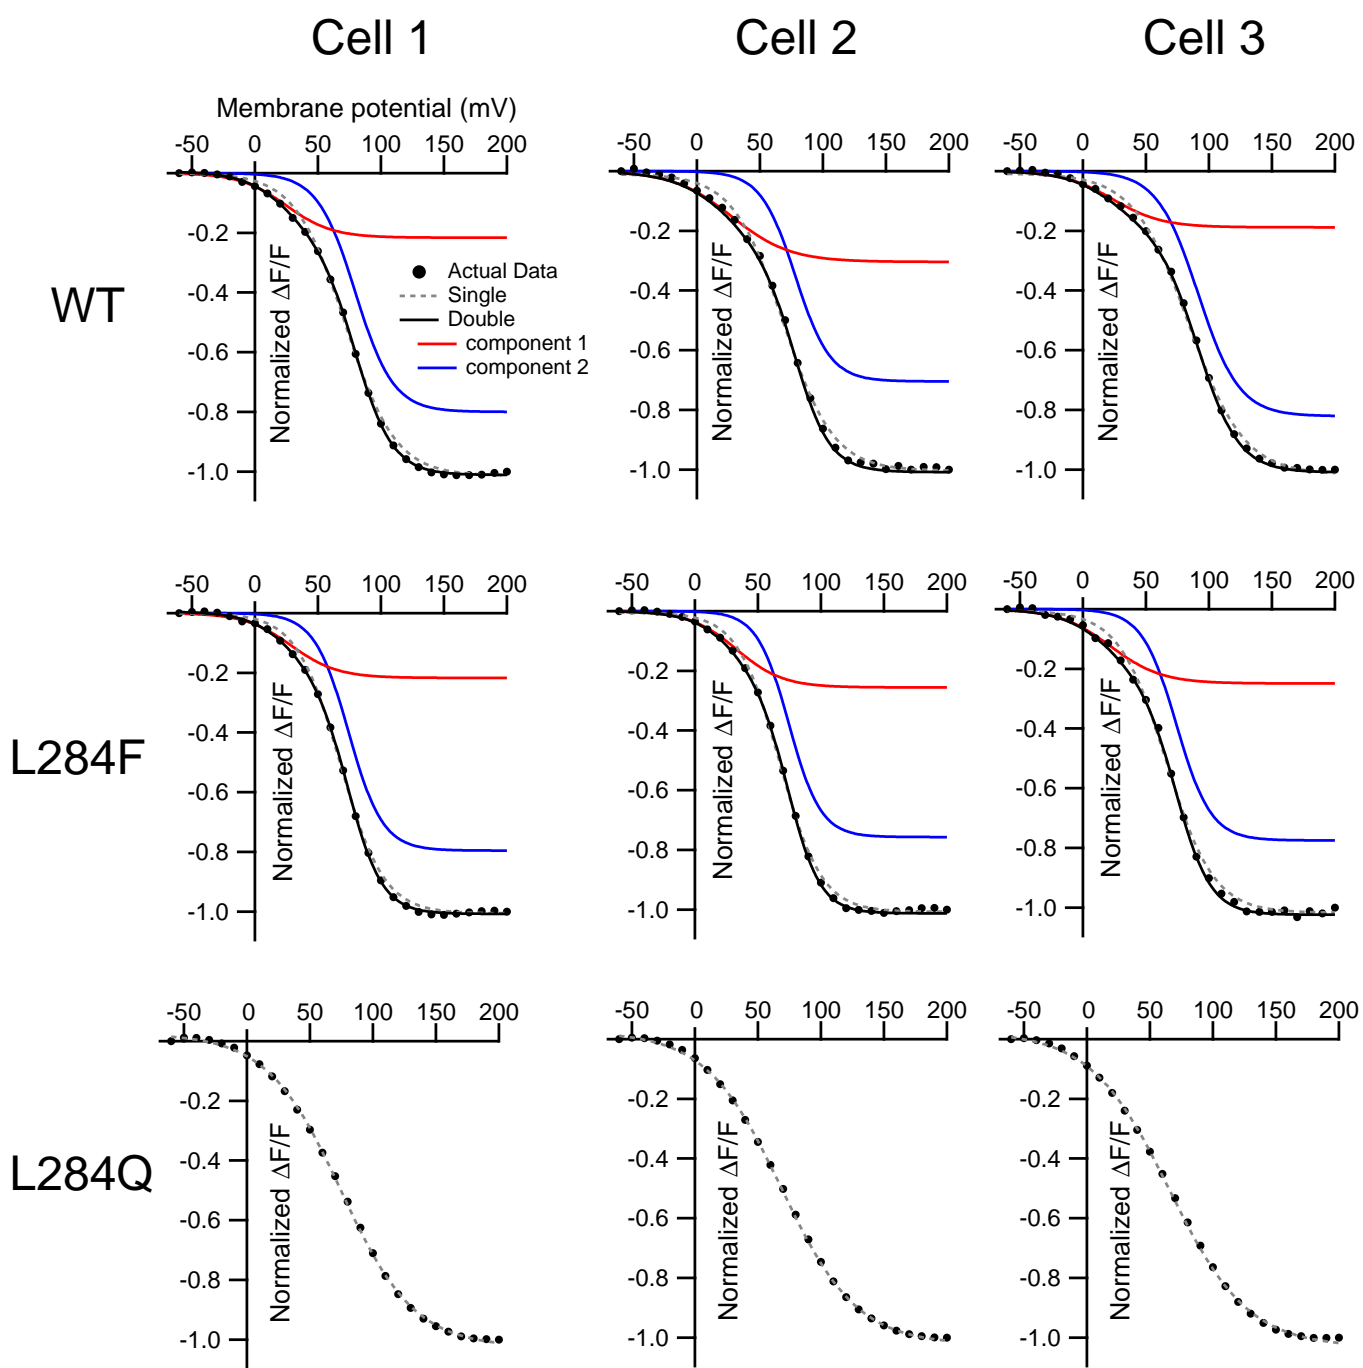

Figure 10- figure supplement 1  
Kawanabe et al.

Supplement: supp [file elife_poa_e41653_Figure_10_figure_supplement_1.pdf › elife_poa_e41653_Figure_10_figure_supplement_1.pdf]

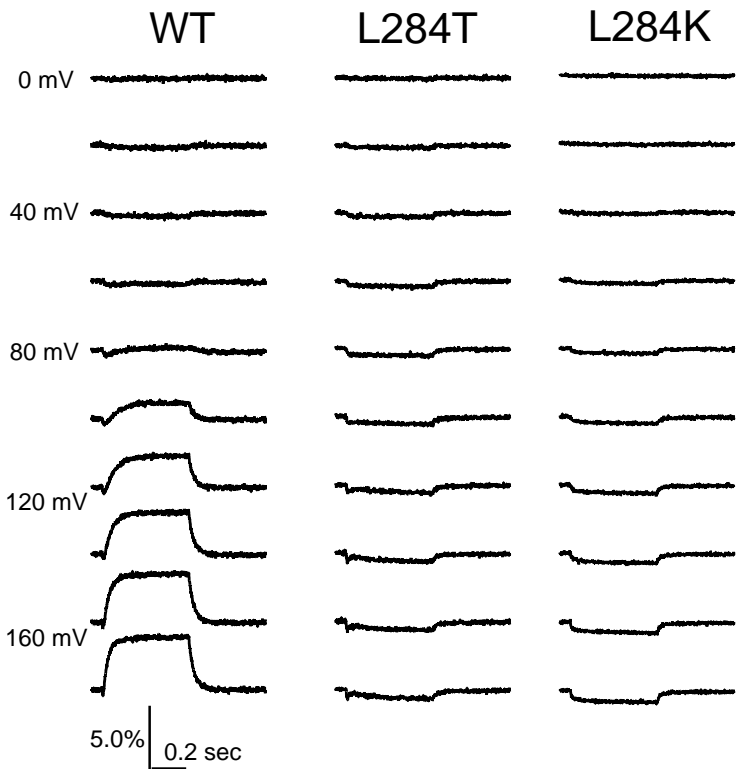

Figure 10- figure supplement 2  
Kawanabe et al.

Supplement: supp [file elife_poa_e41653_Figure_10_figure_supplement_2.pdf › elife_poa_e41653_Figure_10_figure_supplement_2.pdf]

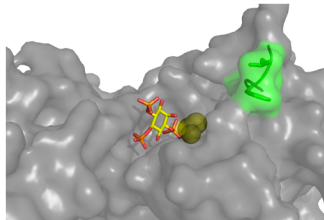

VSP-PD : 3V0H

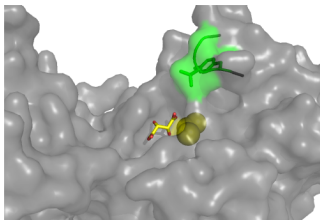

PTEN : 1D5R

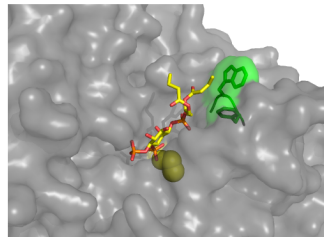

SidF : 4FYG

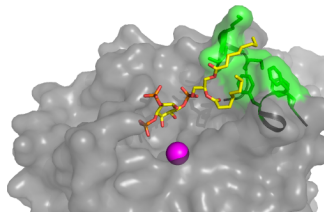

INPP5B : 4CML

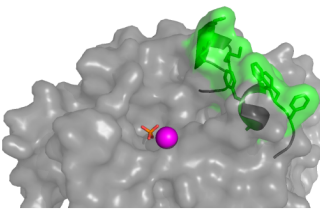

OCRL : 4CMN

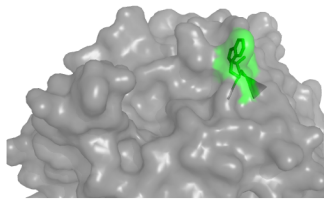

SHIP2 : 3NR8

Figure 11- figure supplement 1 Kawanabe et al.

Supplement: supp [file elife_poa_e41653_Figure_11_figure_supplement1.pdf › elife_poa_e41653_Figure_11_figure_supplement1.pdf]

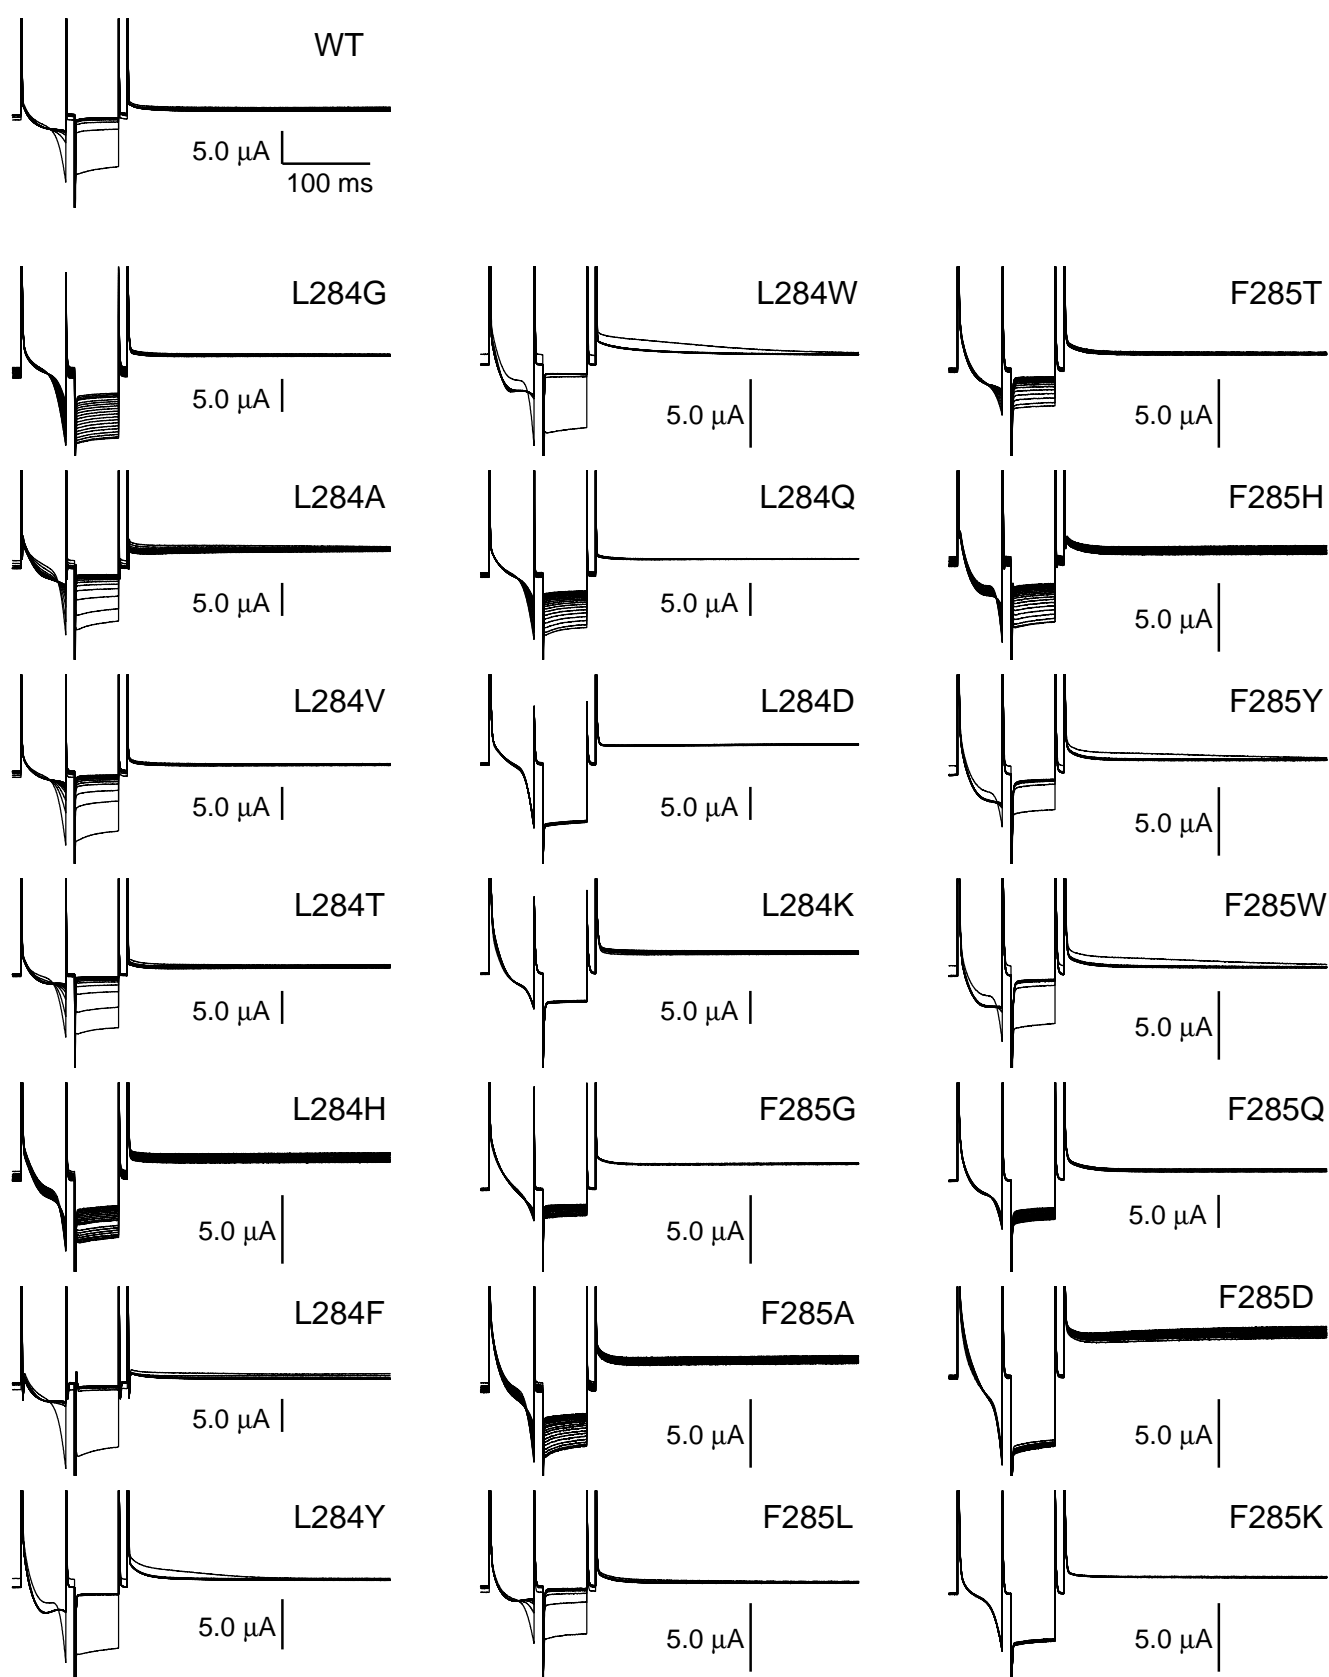

Figure 4- figure supplement 1 Kawanabe et al.

Supplement: supp [file elife_poa_e41653_Figure_4_figure_supplement_1.pdf › elife_poa_e41653_Figure_4_figure_supplement_1.pdf]

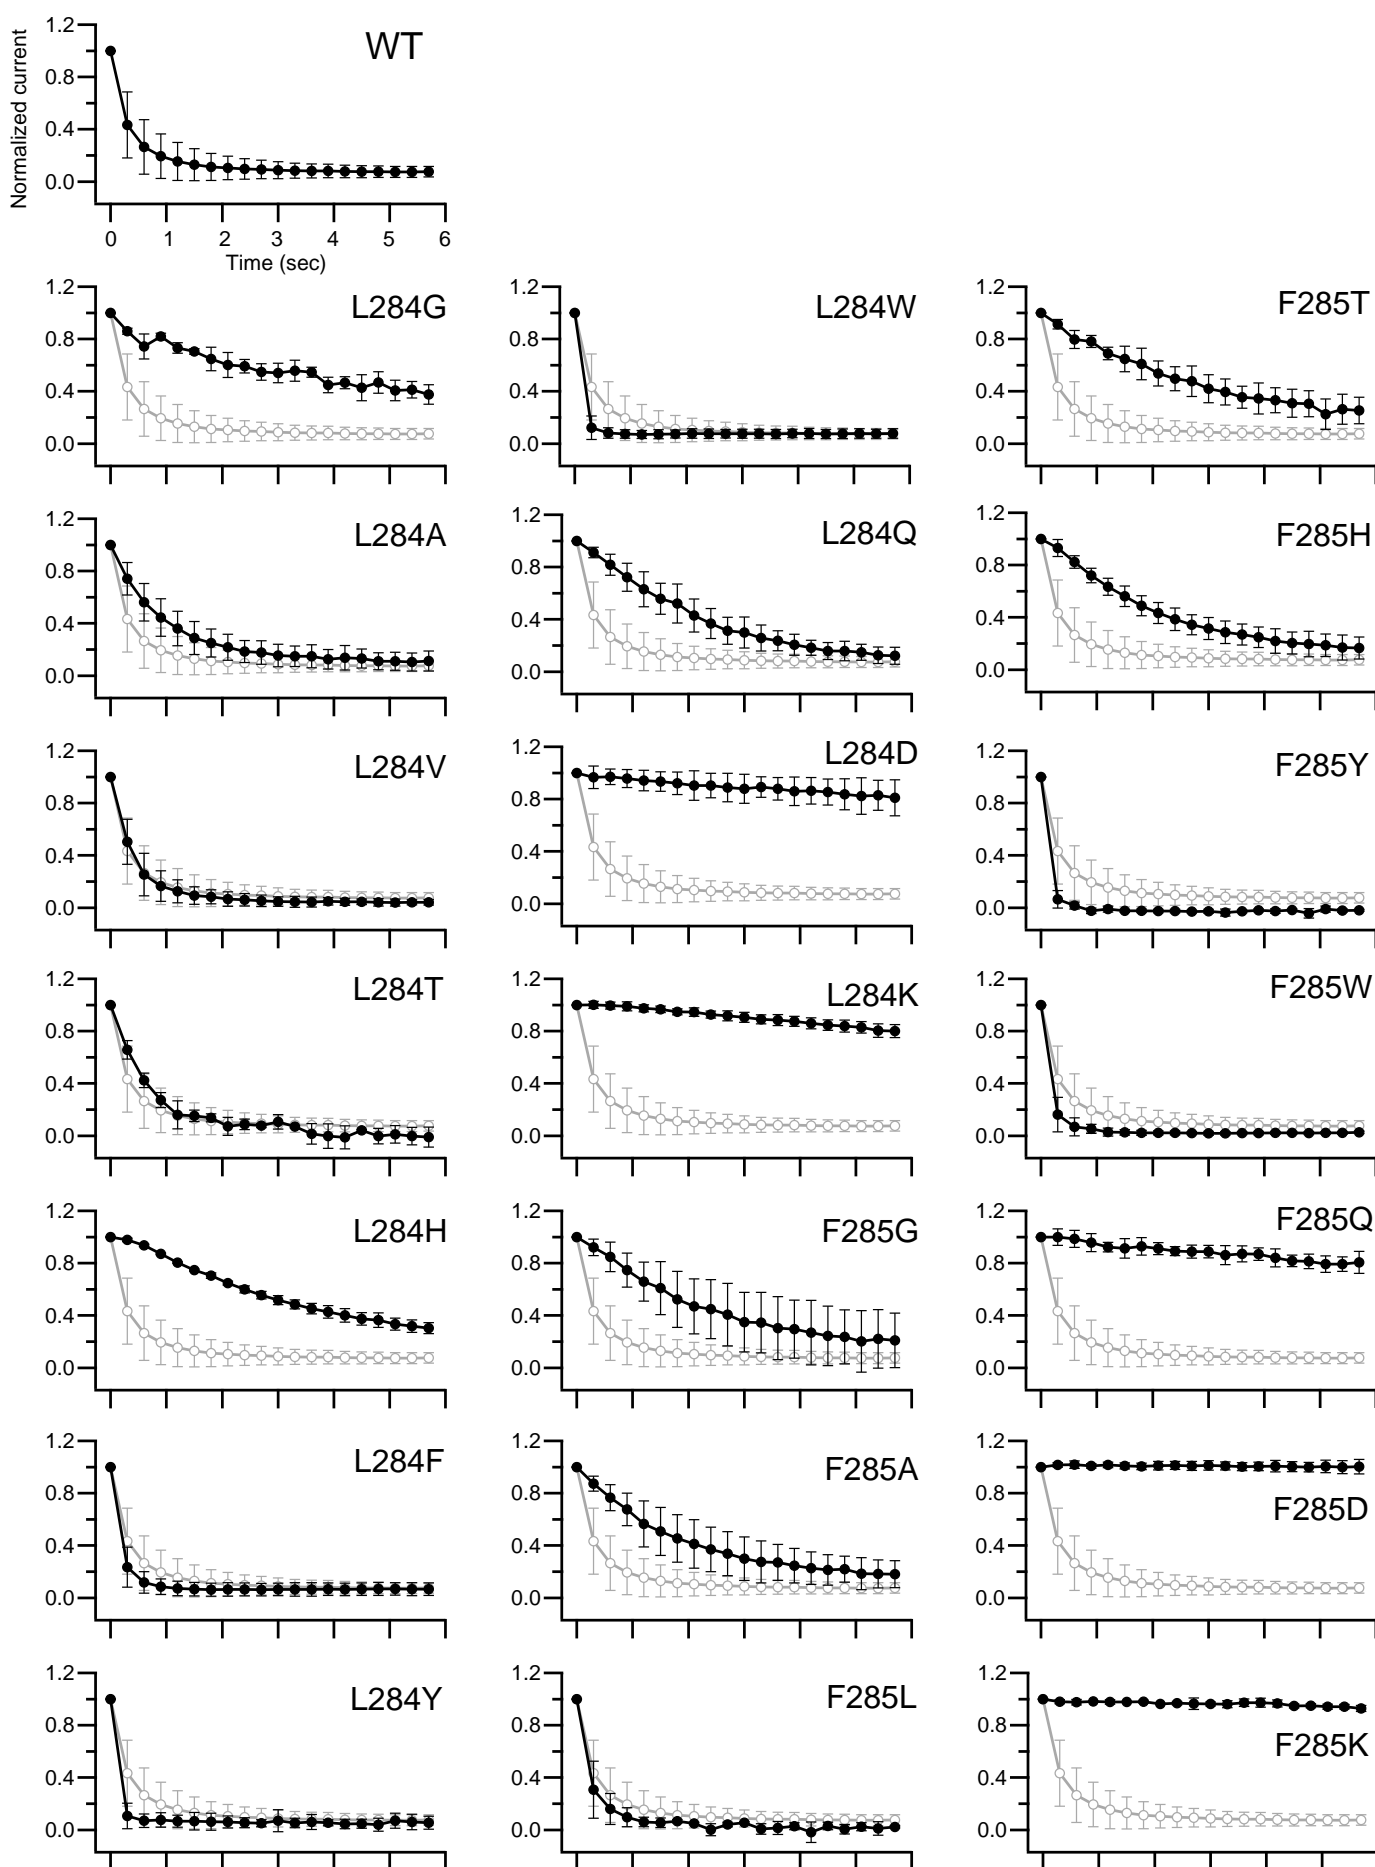

Figure 4- figure supplement 2 Kawanabe et al.

Supplement: supp [file elife_poa_e41653_Figure_4_figure_supplement_2.pdf › elife_poa_e41653_Figure_4_figure_supplement_2.pdf]

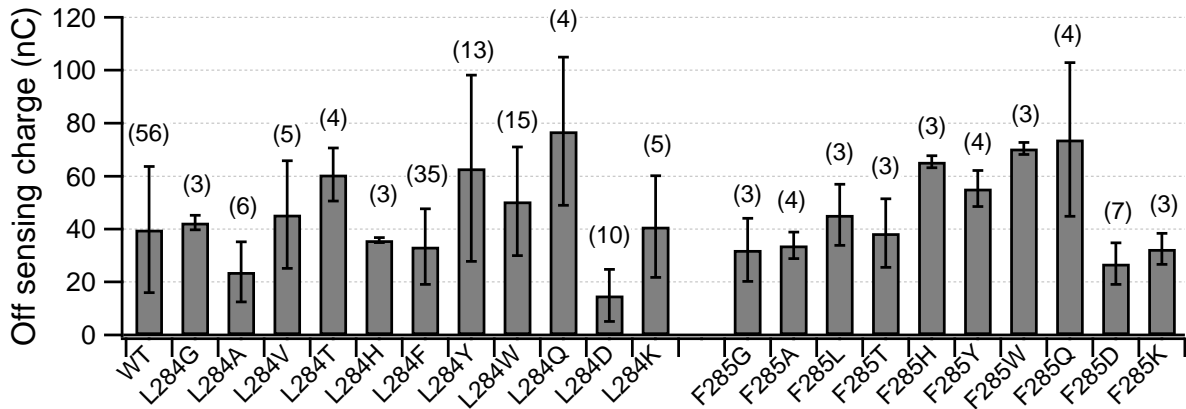

Figure 5- figure supplement 1 Kawanabe et al.

Supplement: supp [file elife_poa_e41653_Figure_5_figure_supplement_1.pdf › elife_poa_e41653_Figure_5_figure_supplement_1.pdf]

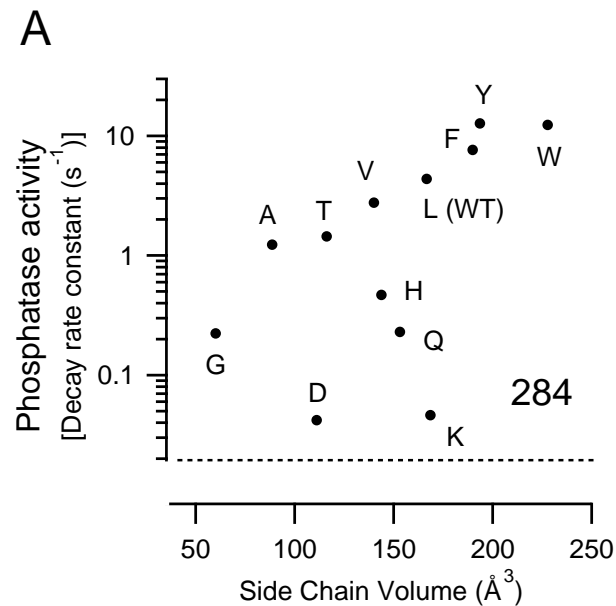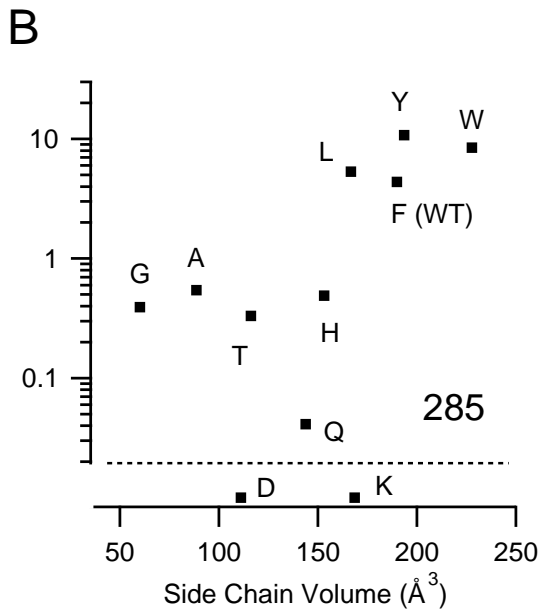

Figure 5- figure supplement 2 Kawanabe et al.

Supplement: supp [file elife_poa_e41653_Figure_5_figure_supplement_2.pdf › elife_poa_e41653_Figure_5_figure_supplement_2.pdf]

A

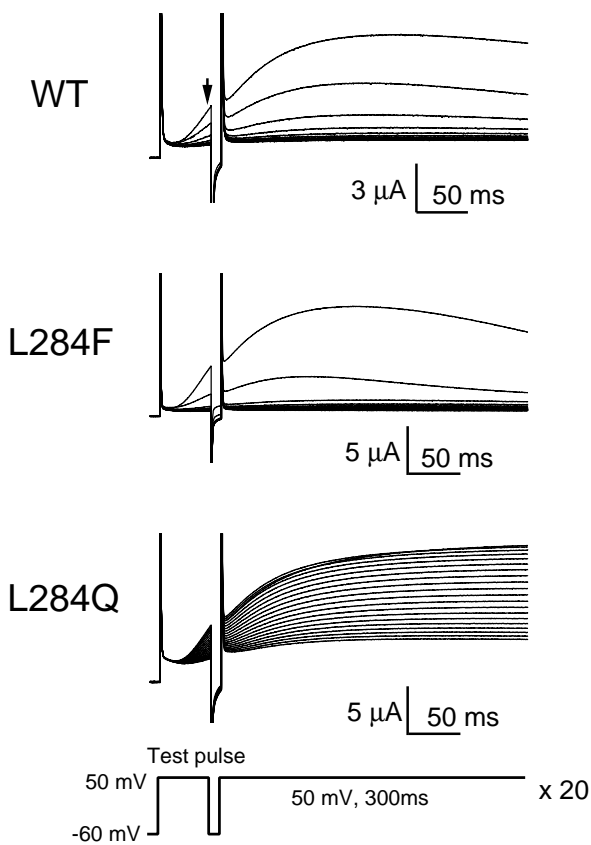

B

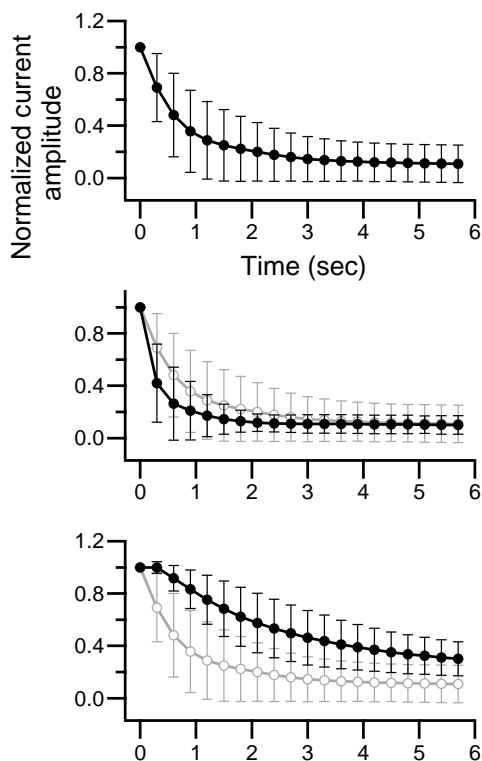

C

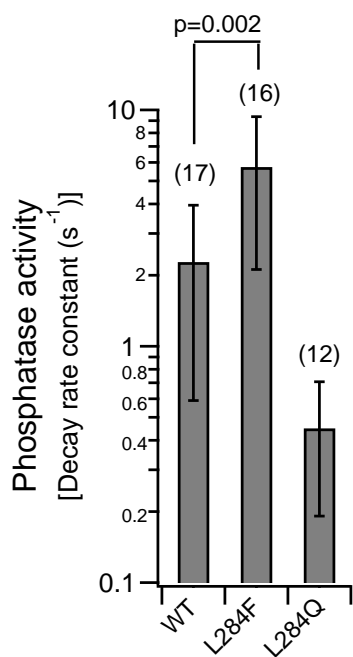

D

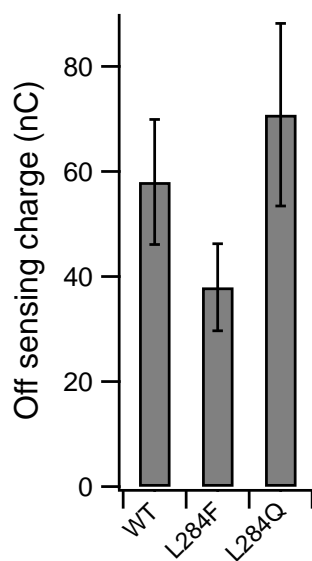

Figure 5- figure supplement 3 Kawanabe et al.

Supplement: supp [file elife_poa_e41653_Figure_5_figure_supplement_3.pdf › elife_poa_e41653_Figure_5_figure_supplement_3.pdf]

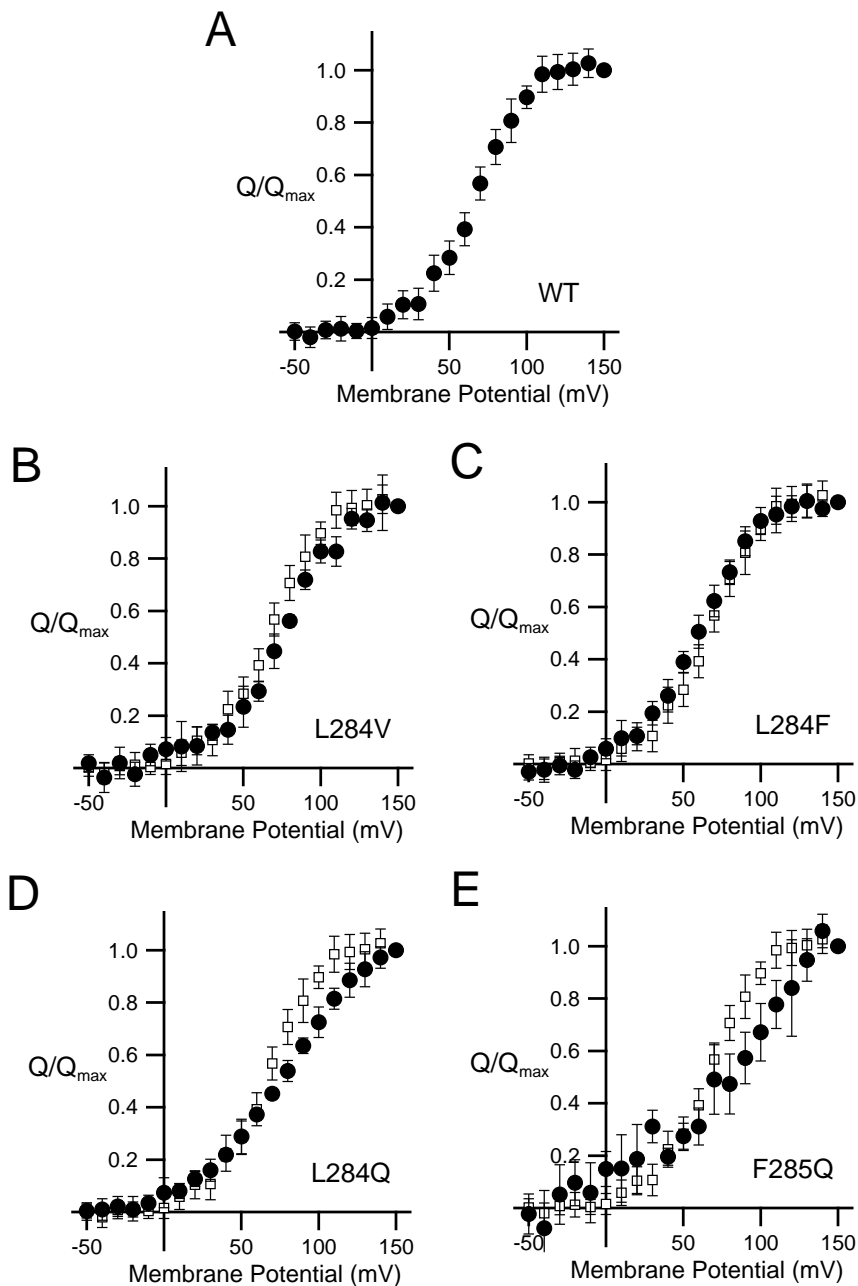

Figure 8- figure supplement 1 Kawanabe et al.

Supplement: supp [file elife_poa_e41653_Figure_8_figure_supplement_1.pdf › elife_poa_e41653_Figure_8_figure_supplement_1.pdf]

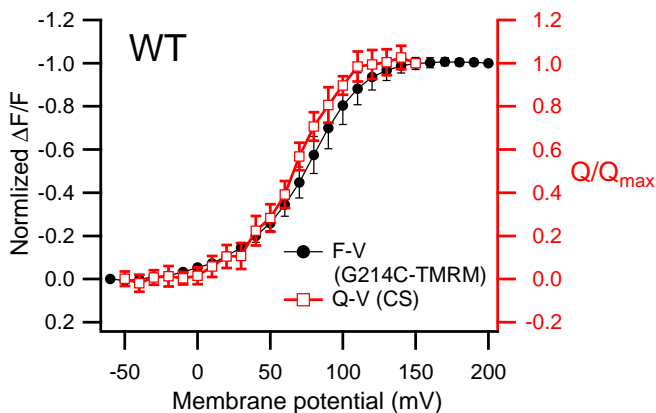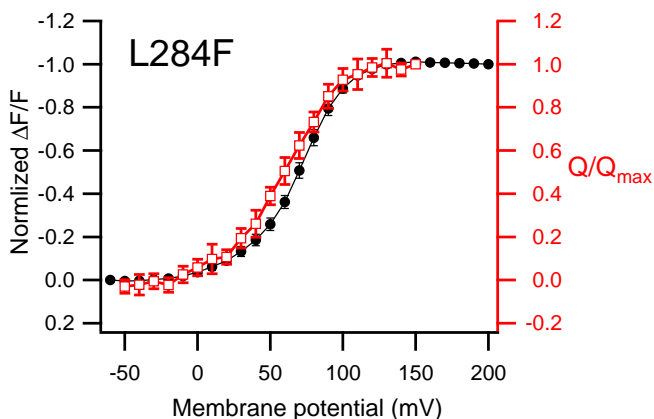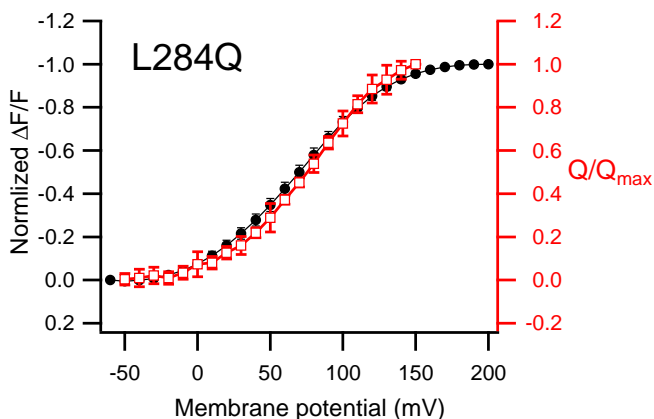

Figure 8- figure supplement 2  
Kawanabe et al.

Supplement: supp [file elife_poa_e41653_Figure_8_figure_supplement_2.pdf › elife_poa_e41653_Figure_8_figure_supplement_2.pdf]

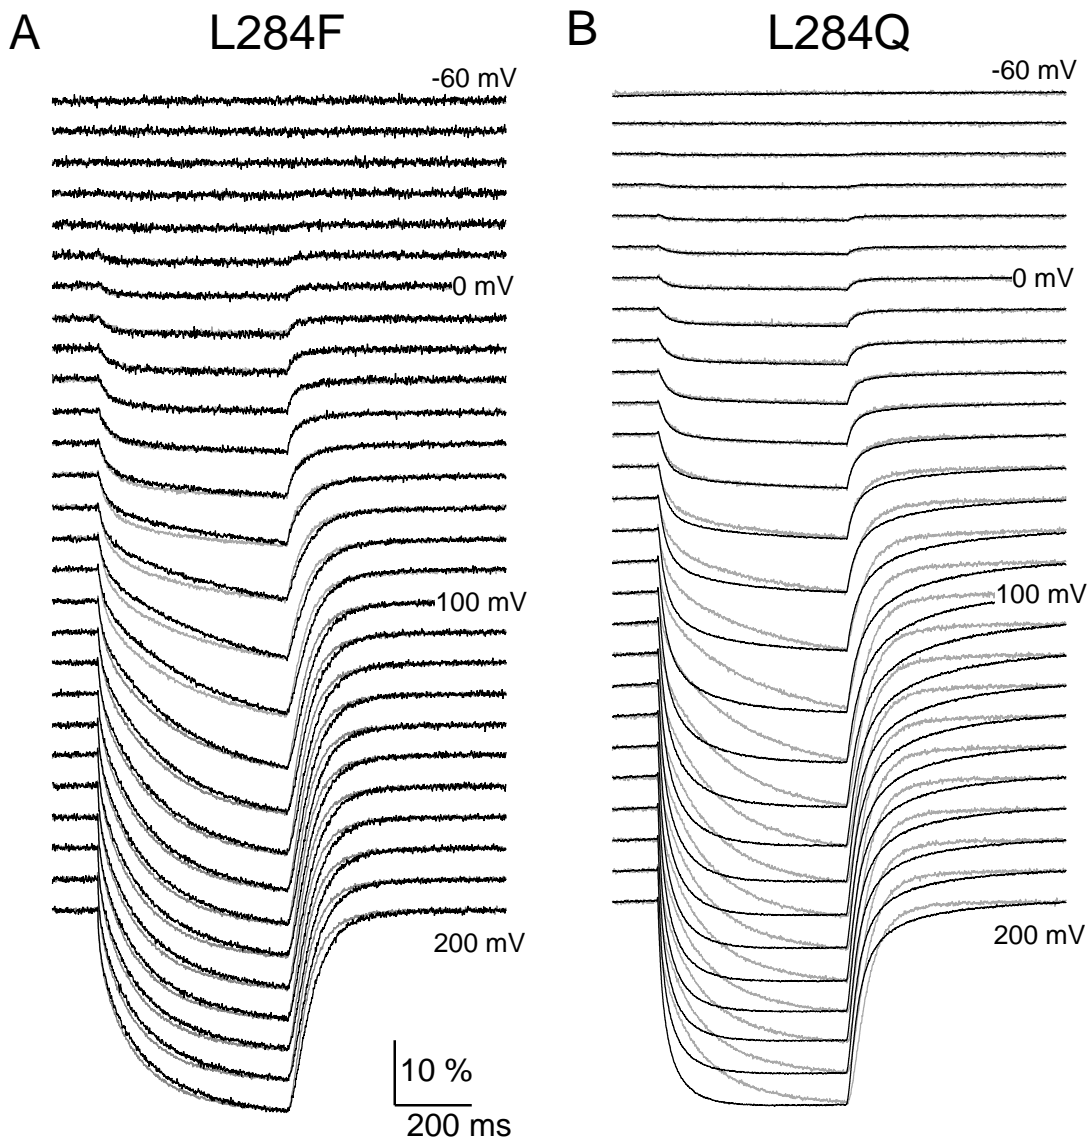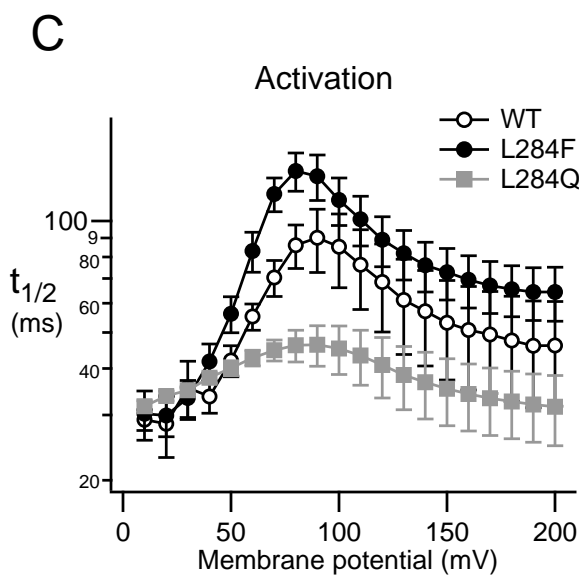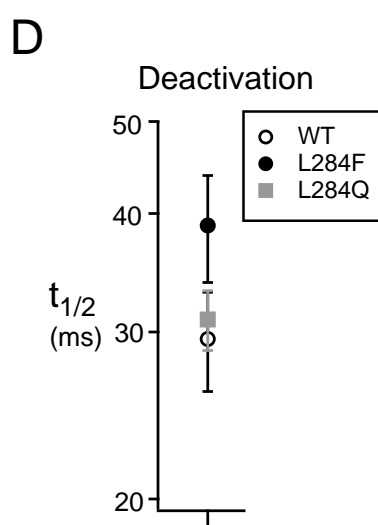

Figure 8- figure supplement 3 Kawanabe et al.

Supplement: supp [file elife_poa_e41653_Figure_8_figure_supplement_3.pdf › elife_poa_e41653_Figure_8_figure_supplement_3.pdf]

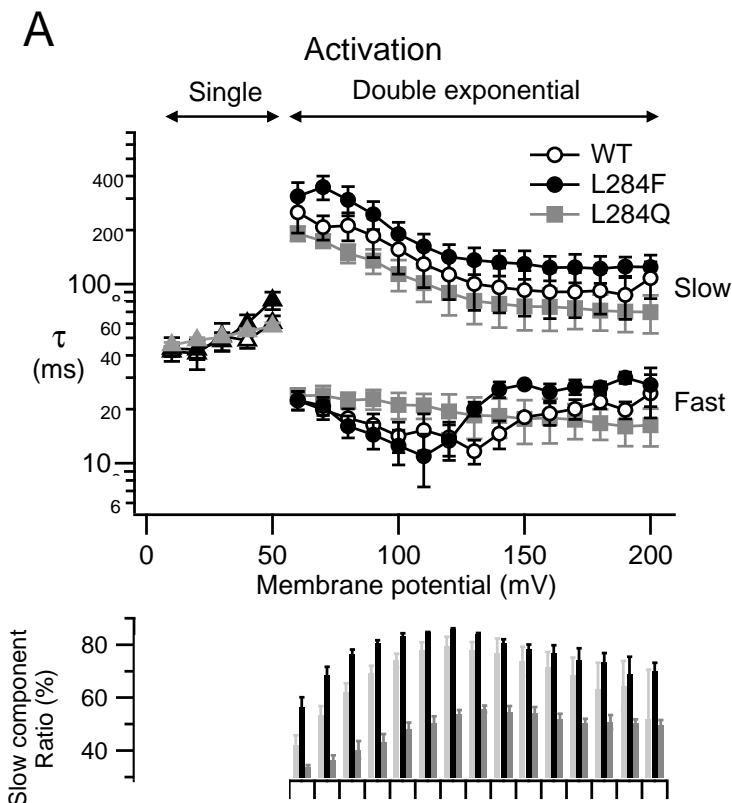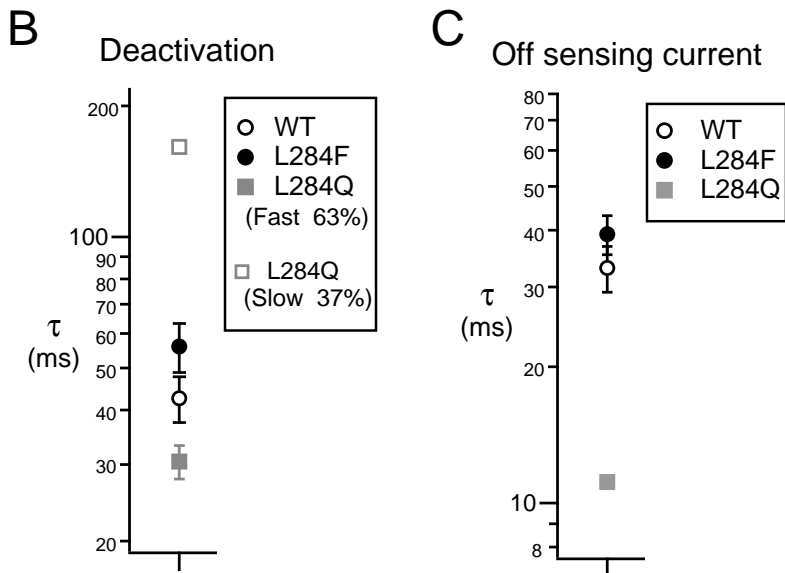

Figure 8- figure supplement 4  
Kawanabe et al.

Supplement: supp [file elife_poa_e41653_Figure_8_figure_supplement_4.pdf › elife_poa_e41653_Figure_8_figure_supplement_4.pdf]

A

WT

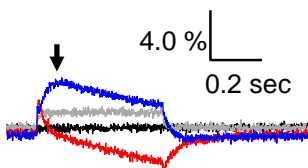

L284F

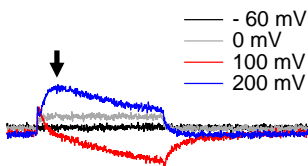

L284Q

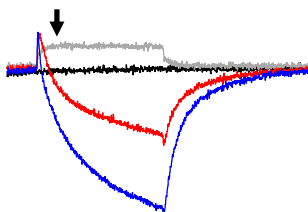

F285Q

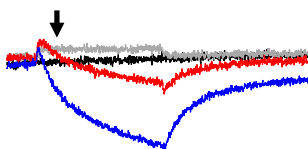

B

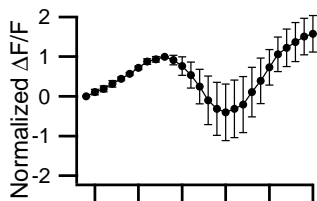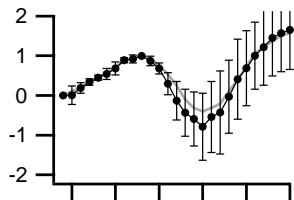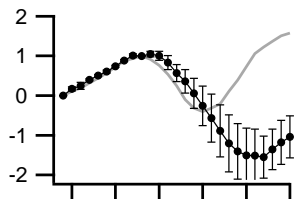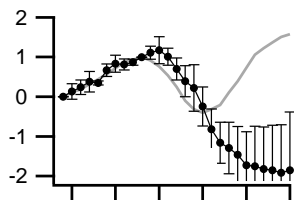

Membrane potential (mV)

Figure 8- figure supplement 5  
Kawanabe et al.

Supplement: supp [file elife_poa_e41653_Figure_8_figure_supplement_5.pdf › elife_poa_e41653_Figure_8_figure_supplement_5.pdf]

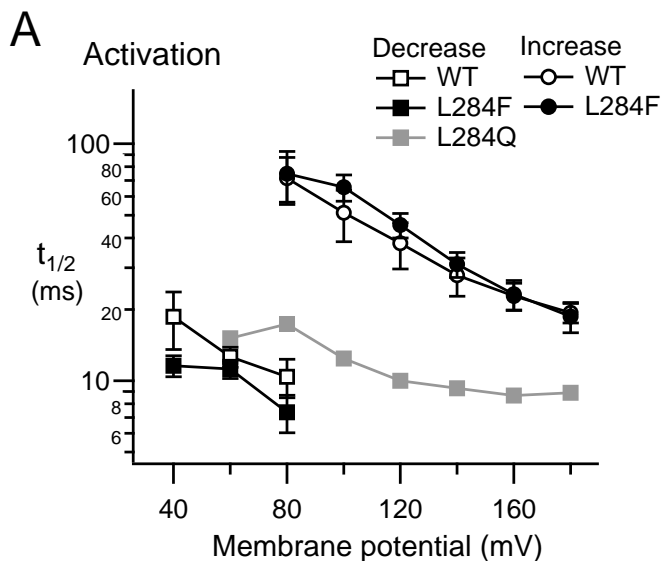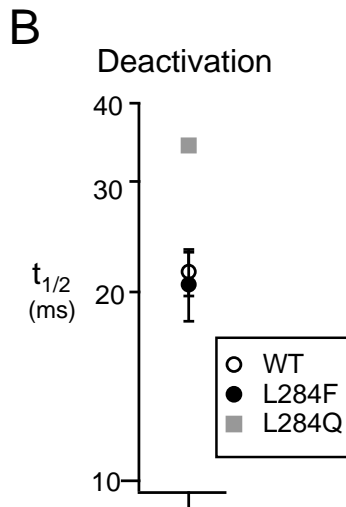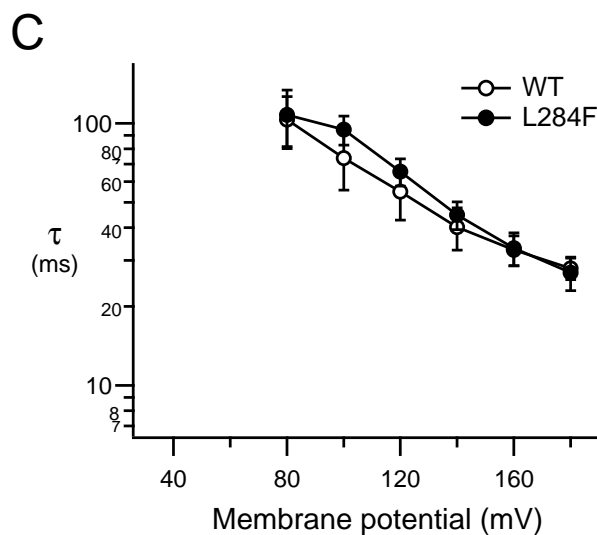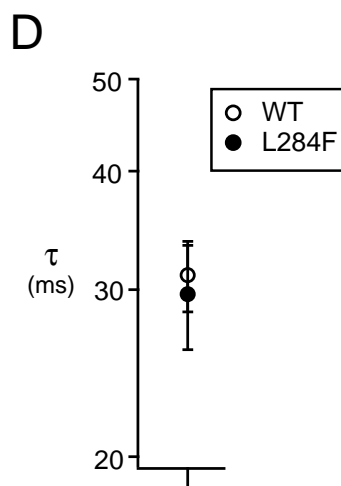

Figure 9- figure supplement 1 Kawanabe et al.

Supplement: supp [file elife_poa_e41653_Figure_9_figure_supplement_1.pdf › elife_poa_e41653_Figure_9_figure_supplement_1.pdf]

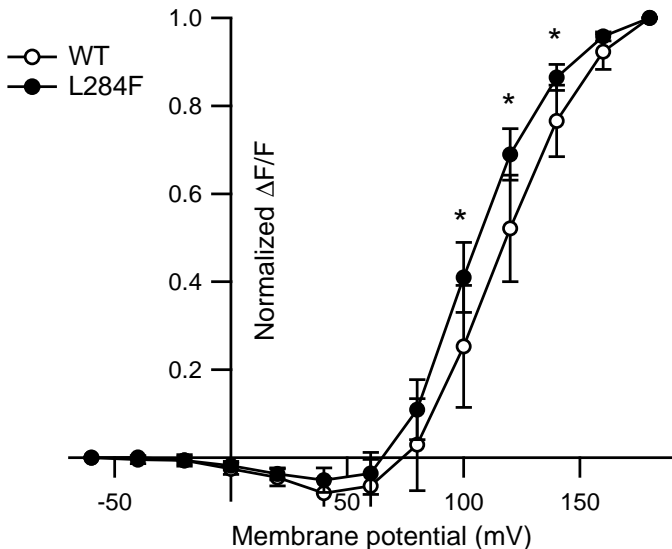

Figure 9- figure supplement 2  
Kawanabe et al.

Supplement: supp [file elife_poa_e41653_Figure_9_figure_supplement_2.pdf › elife_poa_e41653_Figure_9_figure_supplement_2.pdf]
